# Supplementary material for: Prediction of Psilocybin Response in Healthy Volunteers
Source: PubMed Central journal article supplement (PMC3281871; doi:10.1371/journal.pone.0030800), 2012-02-17
Supplement: pone.0030800.s001.pdf [file pone.0030800.s001.pdf]

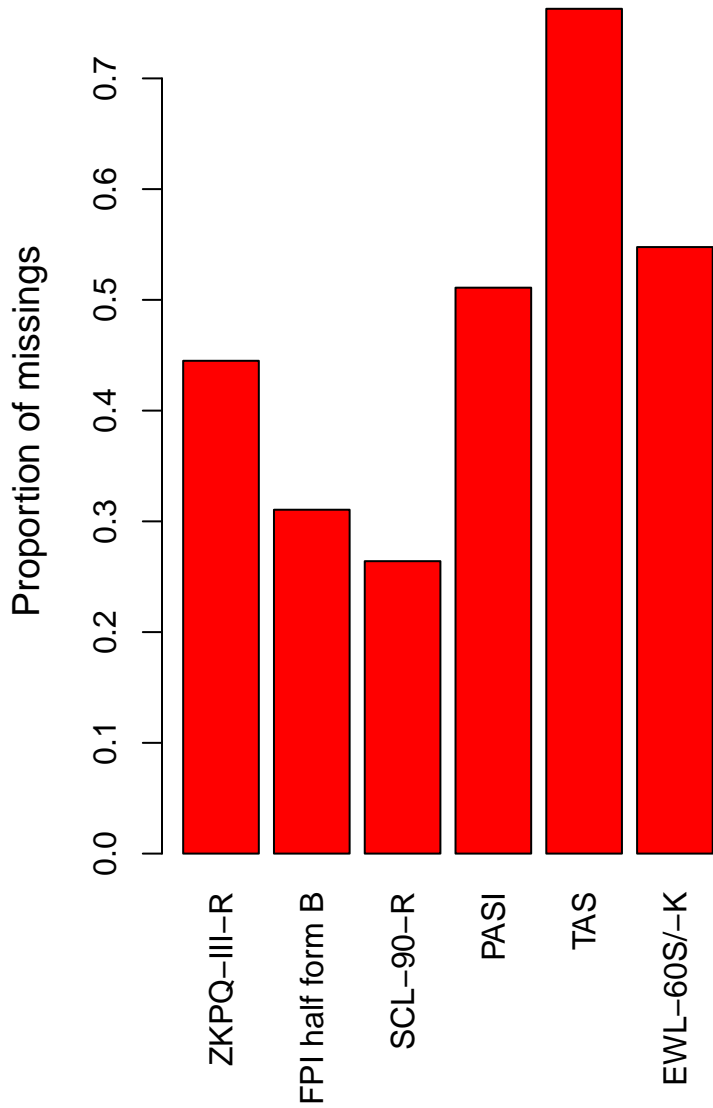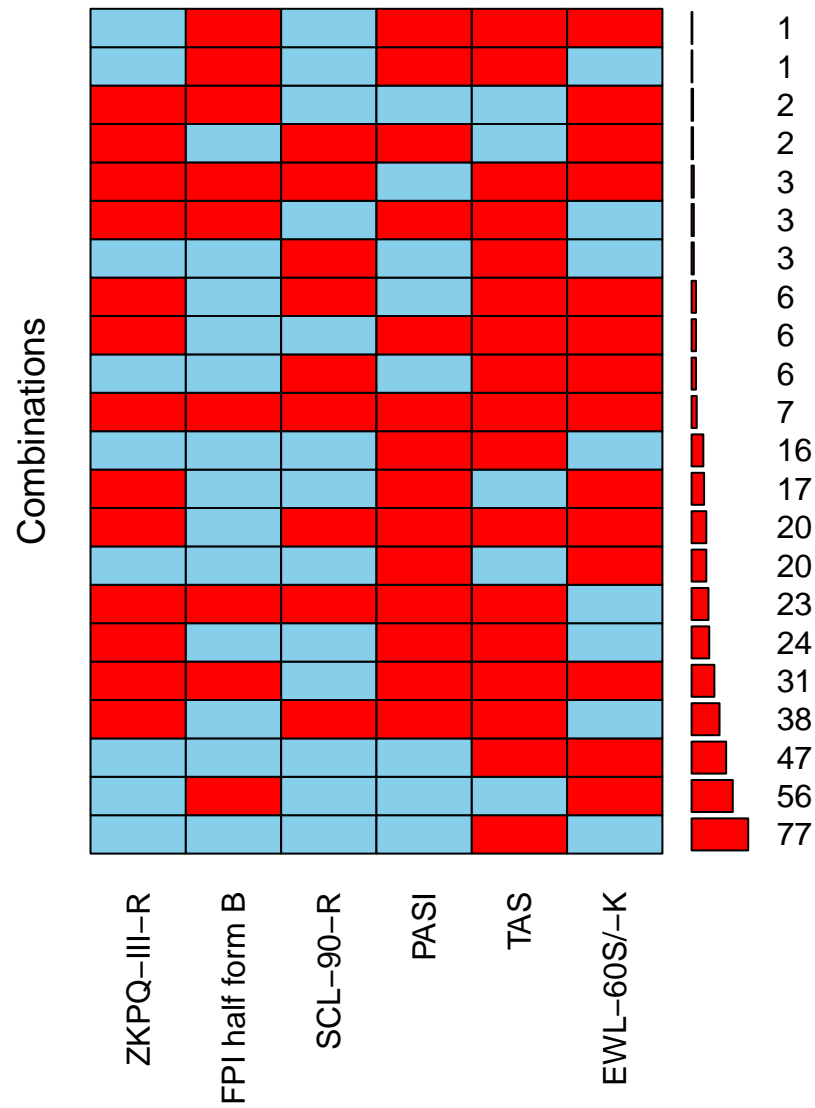

Supplementary Figure 1. Left: Barplot of the proportions of missing values in each questionnaire. Right: All existing combinations of of missing (red) and non-missing (blue) values in the observations.
