# Supplementary material for: Prediction of Psilocybin Response in Healthy Volunteers
Source: PubMed Central journal article supplement (PMC3281871; doi:10.1371/journal.pone.0030800), 2012-02-17
Supplement: pone.0030800.s002.pdf [file pone.0030800.s002.pdf]

**Supplementary Table S1.** English translation of the Passive-Spontaneous Imagination Questionnaire.

|     |                                                                                                                                                                                      |
|-----|--------------------------------------------------------------------------------------------------------------------------------------------------------------------------------------|
| 1.  | When waking up I am able to see lively images, while my eyes are still closed.                                                                                                       |
| 2.  | When listening to music intensely, it can occur that I see images.                                                                                                                   |
| 3.  | It occasionally occurs that my day-dreams distract me from important affairs.                                                                                                        |
| 4.  | I only need to close my eyes and I already see colors.                                                                                                                               |
| 5.  | It can occur that my day-dreams distract me from my day to day tasks.                                                                                                                |
| 6.  | When falling asleep, I see colors.                                                                                                                                                   |
| 7.  | It has occurred that I have imagined something so intensely, that it seemed to become reality.                                                                                       |
| 8.  | When looking through holiday photographs, I imagine entire scenes from my holiday memories with vivid precision.                                                                     |
| 9.  | When something unpleasant enters my mind, I see images.                                                                                                                              |
| 10. | It has occurred, that no matter how hard I tried I could not remember the name of a relative or close friend, although I could see the image of his/her face clearly in front of me. |
| 11. | It sometimes happens that on long car or train journeys, I begin to visualize images so intensely that my perception of the outside world begins to fade.                            |
| 12. | When falling asleep, I see image.                                                                                                                                                    |
| 13. | It occurs that by looking at an object intensely I get the feeling that it starts to change right in front of me.                                                                    |
| 14. | It can occur that when I close my eyes I see whole scenes.                                                                                                                           |
| 15. | It has happened that for a fraction of a second I believed to have seen a person in front of me, who could never have been there in reality.                                         |
| 16. | I have seen creatures or beings chase each other across the sky on cloudy days.                                                                                                      |
| 17. | My day-dreams are so vivid and clear, that they feel as though they are real.                                                                                                        |
| 18. | While I work, images from my own life seem to flow past my mind's eye.                                                                                                               |
| 19. | It has occurs that in the dark I can get agitated because I get the impression that something is moving.                                                                             |
| 20. | When falling asleep I see entire scenes.                                                                                                                                             |
| 21. | When I think about something, images spontaneously appear.                                                                                                                           |
| 22. | I have experienced unpleasant thoughts and ideas which I was unable to get rid of.                                                                                                   |
| 23. | When I observe clouds, I spontaneously see images and figures.                                                                                                                       |
| 24. | It can happen that my imagination gets the better of me.                                                                                                                             |
| 25. | When I close my eyes I immediately see precise patterns.                                                                                                                             |
| 26. | It has occurred that by reading an exciting story I have experienced the scenario so vividly that it almost feels like watching a movie.                                             |
| 27. | It can occur that I am almost unable to distinguish between my imagined images and reality.                                                                                          |
| 28. | When falling asleep I see patterns.                                                                                                                                                  |
| 29. | It can occur that by smelling something, a related image spontaneously appears.                                                                                                      |
| 30. | In quiet hours I have imagined entire worlds which seemed to exist as reality for months.                                                                                            |
