# Supplementary material for: Prediction of Psilocybin Response in Healthy Volunteers
Source: PubMed Central journal article supplement (PMC3281871; doi:10.1371/journal.pone.0030800), 2012-02-17
Supplement: pone.0030800.s003.pdf [file pone.0030800.s003.pdf]

**Supplementary Table S2.** Overlapping items of the EWL-K and EWL-60-S questionnaires.

| German                             | English                             |
|------------------------------------|-------------------------------------|
| <b>Leistungsbezogene Aktivität</b> | <b>Performance-Related Activity</b> |
| tatkräftig                         | go-getting                          |
| eifrig                             | avid                                |
| aktiv                              | active                              |
| energisch                          | energetic                           |
|                                    |                                     |
| <b>Allgemeine Desaktivität</b>     | <b>General Inactivation</b>         |
| dösig                              | dozy                                |
| schläfrig                          | sleepy                              |
| abgespannt                         | weary                               |
| benebelt                           | blearily                            |
| energielos                         | shiftless                           |
| lasch                              | lax                                 |
| kraftlos                           | feeble                              |
| zermürbt                           | harassed                            |
| müde                               | tired                               |
| schlaftrunken                      | drowsy                              |
| lahm                               | lame                                |
|                                    |                                     |
| <b>Extraversion/Intraversion</b>   | <b>Extroversion/Introversion</b>    |
| gesprächig                         | talkative                           |
| einsilbig*                         | monosyllabic*                       |
| wortkarg*                          | reticent*                           |
| gesellig                           | sociable                            |
| abgesondert*                       | separated*                          |
| menschenscheu*                     | unsociable*                         |
| zutraulich                         | confiding                           |
| kontaktfreudig                     | outgoing                            |
|                                    |                                     |
| <b>Allgemeines Wohlbehagen</b>     | <b>General Well-Being</b>           |
| froh                               | glad                                |
| unbekümmert                        | carefree                            |
| heiter                             | cheerful                            |
| lustig                             | amused                              |
| selbstsicher                       | confident                           |
| freudig                            | joyful                              |
|                                    |                                     |
| <b>Emotionale Gereiztheit</b>      | <b>Emotional Excitability</b>       |
| ärgerlich                          | annoyed                             |
| aufgeregt                          | excited                             |
| erregbar                           | excitable                           |
| wütend                             | angry                               |
| nervös                             | nervous                             |
| zappelig                           | fidgety                             |
| verletzbar                         | violable                            |
| erregt                             | agitated                            |
| Verwundbar                         | vulnerable                          |
| gereizt                            | irritable                           |
| verärgert                          | upset                               |

| <b>Angst/Deprimiertheit</b> | <b>Anxiety/Depressiveness</b> |
|-----------------------------|-------------------------------|
| betrübt                     | saddened                      |
| traurig                     | sad                           |
| bekommen                    | apprehensive                  |
| sorgenvoll                  | sorrowful                     |
| angsterfüllt                | fearful                       |
| elend                       | miserable                     |
| furchtsam                   | timid                         |

\*Items scores are subtracted
