# Supplementary material for: Prediction of Psilocybin Response in Healthy Volunteers
Source: PubMed Central journal article supplement (PMC3281871; doi:10.1371/journal.pone.0030800), 2012-02-17
Supplement: pone.0030800.s004.pdf [file pone.0030800.s004.pdf]

**Supplementary Table S3.** Selection frequencies of variables at Step 1 and models at Step 2 as a result of the bootstrap model selection process (top) and pooled parameter estimates of the most frequently selected models (bottom).

*Model selection for the dependent variable  $\sqrt{G-ASC}$*

| Predictors                             | Step 1 (%) | Models selected in step 2 (the first 10 models are shown)* |       |       |       |       |       |       |       |       |        |
|----------------------------------------|------------|------------------------------------------------------------|-------|-------|-------|-------|-------|-------|-------|-------|--------|
|                                        |            | 1 (6)                                                      | 2 (5) | 3 (5) | 4 (4) | 5 (5) | 6 (5) | 7 (4) | 8 (4) | 9 (4) | 10 (5) |
| 1. Drug dose                           | 100.0      | ✓                                                          | ✓     | ✓     | ✓     | ✓     | ✓     | ✓     | ✓     | ✓     | ✓      |
| 2. Absorption (TAS)                    | 84.8       | ✓                                                          | ✓     | ✓     | ✓     | ✓     | ✓     | ✓     | ✓     | ✓     | –      |
| 3. Performance-Related Activity (EWL)  | 78.4       | ✓                                                          | ✓     | ✓     | ✓     | ✓     | –     | ✓     | –     | –     | ✓      |
| 4. General Inactivation (EWL)          | 66.8       | ✓                                                          | ✓     | ✓     | ✓     | –     | ✓     | –     | –     | ✓     | ✓      |
| 5. Hallucinogen-naïve                  | 66.3       | ✓                                                          | –     | ✓     | –     | ✓     | ✓     | –     | ✓     | ✓     | ✓      |
| 6. Emotional Excitability (EWL)        | 64.0       | ✓                                                          | ✓     | –     | –     | ✓     | ✓     | ✓     | ✓     | –     | ✓      |
| 7. General Well-Being (EWL)            | 46.0       |                                                            |       |       |       |       |       |       |       |       |        |
| 8. Anxiety-Depressiveness (EWL)        | 45.6       |                                                            |       |       |       |       |       |       |       |       |        |
| 9. Global Severity Index (SCL-90-R)    | 44.2       |                                                            |       |       |       |       |       |       |       |       |        |
| 10. Activity (ZKPQ)                    | 41.4       |                                                            |       |       |       |       |       |       |       |       |        |
| 11. Extroversion-Introversion (EWL)    | 40.6       |                                                            |       |       |       |       |       |       |       |       |        |
| 12. Positron emission tomography       | 37.8       |                                                            |       |       |       |       |       |       |       |       |        |
| 13. Alcohol frequency                  | 36.4       |                                                            |       |       |       |       |       |       |       |       |        |
| 14. Sociability (ZKPQ)                 | 34.8       |                                                            |       |       |       |       |       |       |       |       |        |
| 15. Impulsive Sensation Seeking (ZKPQ) | 33.5       |                                                            |       |       |       |       |       |       |       |       |        |
| 16. Aggression-Hostility (ZKPQ)        | 32.9       |                                                            |       |       |       |       |       |       |       |       |        |
| 17. Neuroticism-Anxiety (ZKPQ)         | 26.5       |                                                            |       |       |       |       |       |       |       |       |        |
| 18. Daily smoker                       | 18.8       |                                                            |       |       |       |       |       |       |       |       |        |
| 19. Years of education                 | 16.4       |                                                            |       |       |       |       |       |       |       |       |        |
| 20. Age                                | 13.0       |                                                            |       |       |       |       |       |       |       |       |        |
| 21. Body mass index                    | 11.7       |                                                            |       |       |       |       |       |       |       |       |        |
| 22. Time of measuring                  | 11.2       |                                                            |       |       |       |       |       |       |       |       |        |
| 23. THC frequency                      | 9.3        |                                                            |       |       |       |       |       |       |       |       |        |
| 24. Female                             | 7.5        |                                                            |       |       |       |       |       |       |       |       |        |
| Model selection frequency (%)          |            | 24.2                                                       | 14.4  | 11.3  | 7.6   | 7.4   | 5.2   | 5.0   | 4.1   | 3.0   | 2.5    |

✓, variables included in the model; –, variables not selected.

\* The number of variables in the model is given within parentheses.

*Pooled parameter estimates of the best model for the dependent variable  $\sqrt{G-ASC}$*

| Predictors                         | Coefficient | Standard error | P-value |     | HPD CI low | HPD CI high | n missings | FMI  | RIV  |
|------------------------------------|-------------|----------------|---------|-----|------------|-------------|------------|------|------|
| Drug dose                          | 0.78        | 0.09           | 0.00    | *** | 0.60       | 0.96        | 0          | 0.07 | 0.08 |
| Absorption (TAS)                   | 0.35        | 0.12           | 0.00    | **  | 0.11       | 0.58        | 312        | 0.44 | 0.76 |
| Performance-Related Activity (EWL) | 0.33        | 0.12           | 0.01    | **  | 0.10       | 0.56        | 224        | 0.41 | 0.67 |
| General Inactivation (EWL)         | 0.18        | 0.11           | 0.11    |     | -0.04      | 0.40        | 224        | 0.33 | 0.47 |
| Hallucinogen-naïve                 | 0.16        | 0.10           | 0.11    |     | -0.04      | 0.36        | 40         | 0.18 | 0.21 |
| Emotional Excitability (EWL)       | 0.26        | 0.12           | 0.03    | *   | 0.03       | 0.48        | 224        | 0.46 | 0.82 |

Note. HPD = Highest Posterior Density. CI = Confidence Interval. FMI = Fraction of missing information. RIV = Relative increase in variance due to missingness.

Model selection for the dependent variable  $\sqrt{\text{Oceanic Boundlessness}}$

| Predictors                             | Step 1 (%) | Models selected in step 2 (the first 10 models are shown)* |       |       |       |       |       |       |       |       |        |
|----------------------------------------|------------|------------------------------------------------------------|-------|-------|-------|-------|-------|-------|-------|-------|--------|
|                                        |            | 1 (6)                                                      | 2 (5) | 3 (5) | 4 (4) | 5 (5) | 6 (5) | 7 (4) | 8 (4) | 9 (3) | 10 (4) |
| 1. Drug dose                           | 100.0      | ✓                                                          | ✓     | ✓     | ✓     | ✓     | ✓     | ✓     | ✓     | ✓     | ✓      |
| 2. Absorption (TAS)                    | 88.7       | ✓                                                          | ✓     | ✓     | ✓     | ✓     | ✓     | ✓     | ✓     | ✓     | ✓      |
| 3. General Inactivation (EWL)          | 77.4       | ✓                                                          | ✓     | ✓     | ✓     | -     | ✓     | -     | ✓     | ✓     | -      |
| 4. Performance-Related Activity (EWL)  | 76.0       | ✓                                                          | ✓     | ✓     | ✓     | ✓     | -     | ✓     | -     | -     | -      |
| 5. Global Severity Index (SCL-90-R)    | 62.4       | ✓                                                          | ✓     | -     | -     | ✓     | ✓     | -     | -     | -     | ✓      |
| 6. Emotional Excitability (EWL)        | 62.3       | ✓                                                          | -     | ✓     | -     | ✓     | ✓     | ✓     | ✓     | -     | ✓      |
| 7. Extroversion-Introversion (EWL)     | 46.5       |                                                            |       |       |       |       |       |       |       |       |        |
| 8. General Well-Being (EWL)            | 45.4       |                                                            |       |       |       |       |       |       |       |       |        |
| 9. Activity (ZKPQ)                     | 44.9       |                                                            |       |       |       |       |       |       |       |       |        |
| 10. Anxiety-Depressiveness (EWL)       | 42.2       |                                                            |       |       |       |       |       |       |       |       |        |
| 11. Hallucinogen-naïve                 | 42.2       |                                                            |       |       |       |       |       |       |       |       |        |
| 12. Alcohol frequency                  | 35.2       |                                                            |       |       |       |       |       |       |       |       |        |
| 13. Positron emission tomography       | 34.9       |                                                            |       |       |       |       |       |       |       |       |        |
| 14. Aggression-Hostility (ZKPQ)        | 34.2       |                                                            |       |       |       |       |       |       |       |       |        |
| 15. Impulsive Sensation Seeking (ZKPQ) | 32.8       |                                                            |       |       |       |       |       |       |       |       |        |
| 16. Sociability (ZKPQ)                 | 32.6       |                                                            |       |       |       |       |       |       |       |       |        |
| 17. Neuroticism-Anxiety (ZKPQ)         | 27.8       |                                                            |       |       |       |       |       |       |       |       |        |
| 18. Daily smoker                       | 26.1       |                                                            |       |       |       |       |       |       |       |       |        |
| 19. Age                                | 21.1       |                                                            |       |       |       |       |       |       |       |       |        |
| 20. Years of education                 | 16.3       |                                                            |       |       |       |       |       |       |       |       |        |
| 21. Body mass index                    | 14.6       |                                                            |       |       |       |       |       |       |       |       |        |
| 22. Time of measuring                  | 12.7       |                                                            |       |       |       |       |       |       |       |       |        |
| 23. THC frequency                      | 10.4       |                                                            |       |       |       |       |       |       |       |       |        |
| 24. Female                             | 6.4        |                                                            |       |       |       |       |       |       |       |       |        |
| Model selection frequency (%)          |            | 32.1                                                       | 16.6  | 11.8  | 8.8   | 7.0   | 3.3   | 3.2   | 3.0   | 2.4   | 2.0    |

✓, variables included in the model; -, variables not selected.

\* The number of variables in the model is given within parentheses.

Pooled parameter estimates of the best model for the dependent variable  $\sqrt{\text{Oceanic Boundlessness}}$

| Predictors                         | Coefficient | Standard error | P-value  | HPD CI low | HPD CI high | n missings | FMI  | RIV  |
|------------------------------------|-------------|----------------|----------|------------|-------------|------------|------|------|
| Drug dose                          | 0.70        | 0.09           | 0.00 *** | 0.51       | 0.88        | 0          | 0.11 | 0.13 |
| Absorption (TAS)                   | 0.41        | 0.12           | 0.00 *** | 0.18       | 0.64        | 312        | 0.39 | 0.61 |
| General Inactivation (EWL)         | 0.22        | 0.12           | 0.06     | -0.01      | 0.46        | 224        | 0.39 | 0.61 |
| Performance-Related Activity (EWL) | 0.31        | 0.12           | 0.01 **  | 0.07       | 0.57        | 224        | 0.42 | 0.68 |
| Global Severity Index (SCL-90-R)   | -0.22       | 0.11           | 0.04 *   | -0.42      | -0.01       | 111        | 0.26 | 0.35 |
| Emotional Excitability (EWL)       | 0.24        | 0.12           | 0.05 *   | 0.01       | 0.46        | 224        | 0.45 | 0.78 |

Note. HPD = Highest Posterior Density. CI = Confidence Interval. FMI = Fraction of missing information. RIV = Relative increase in variance due to missingness.

*Model selection for the dependent variable log(Dread of Ego Dissolution)*

| Predictors                             | Step 1 (%) | Models selected in step 2 (the first 10 models are shown)* |       |       |       |       |       |       |       |       |        |
|----------------------------------------|------------|------------------------------------------------------------|-------|-------|-------|-------|-------|-------|-------|-------|--------|
|                                        |            | 1 (5)                                                      | 2 (6) | 3 (4) | 4 (5) | 5 (5) | 6 (4) | 7 (4) | 8 (3) | 9 (5) | 10 (3) |
| 1. Drug dose                           | 100.0      | ✓                                                          | ✓     | ✓     | ✓     | ✓     | ✓     | ✓     | ✓     | ✓     | ✓      |
| 2. Positron emission tomography        | 87.0       | ✓                                                          | ✓     | ✓     | ✓     | ✓     | ✓     | ✓     | ✓     | ✓     | ✓      |
| 3. Time of measuring                   | 72.4       | ✓                                                          | ✓     | ✓     | ✓     | ✓     | ✓     | ✓     | ✓     | -     | -      |
| 4. Emotional Excitability (EWL)        | 64.2       | ✓                                                          | ✓     | ✓     | ✓     | -     | -     | -     | -     | ✓     | ✓      |
| 5. Hallucinogen-naïve                  | 60.0       | ✓                                                          | ✓     | -     | -     | ✓     | ✓     | -     | -     | ✓     | -      |
| 6. General Well-Being (EWL)            | 50.3       | -                                                          | ✓     | -     | ✓     | ✓     | -     | ✓     | -     | ✓     | -      |
| 7. Sociability (ZKPQ)                  | 48.8       |                                                            |       |       |       |       |       |       |       |       |        |
| 8. Absorption (TAS)                    | 48.0       |                                                            |       |       |       |       |       |       |       |       |        |
| 9. General Inactivation (EWL)          | 47.9       |                                                            |       |       |       |       |       |       |       |       |        |
| 10. Performance-Related Activity (EWL) | 47.1       |                                                            |       |       |       |       |       |       |       |       |        |
| 11. Age                                | 46.6       |                                                            |       |       |       |       |       |       |       |       |        |
| 12. Extroversion-Introversion (EWL)    | 44.3       |                                                            |       |       |       |       |       |       |       |       |        |
| 13. Global Severity Index (SCL-90-R)   | 41.9       |                                                            |       |       |       |       |       |       |       |       |        |
| 14. Anxiety-Depressiveness (EWL)       | 39.0       |                                                            |       |       |       |       |       |       |       |       |        |
| 15. Impulsive Sensation Seeking (ZKPQ) | 35.2       |                                                            |       |       |       |       |       |       |       |       |        |
| 16. Activity (ZKPQ)                    | 31.8       |                                                            |       |       |       |       |       |       |       |       |        |
| 17. Neuroticism-Anxiety (ZKPQ)         | 29.5       |                                                            |       |       |       |       |       |       |       |       |        |
| 18. Aggression-Hostility (ZKPQ)        | 28.0       |                                                            |       |       |       |       |       |       |       |       |        |
| 19. Alcohol frequency                  | 23.8       |                                                            |       |       |       |       |       |       |       |       |        |
| 20. Daily smoker                       | 20.9       |                                                            |       |       |       |       |       |       |       |       |        |
| 21. Female                             | 19.9       |                                                            |       |       |       |       |       |       |       |       |        |
| 22. Body mass index                    | 18.8       |                                                            |       |       |       |       |       |       |       |       |        |
| 23. Years of education                 | 15.9       |                                                            |       |       |       |       |       |       |       |       |        |
| 24. THC frequency                      | 12.8       |                                                            |       |       |       |       |       |       |       |       |        |
| Model selection frequency (%)          |            | 18.1                                                       | 15.8  | 12.3  | 9.0   | 8.2   | 5.0   | 4.4   | 3.8   | 2.8   | 2.7    |

✓, variables included in the model; -, variables not selected.

\* The number of variables in the model is given within parentheses.

*Pooled parameter estimates of the best model for the dependent variable log(Dread of Ego Dissolution)*

| Predictors                   | Coefficient | Standard error | P-value |     | HPD CI low | HPD CI high | n missings | FMI  | RIV  |
|------------------------------|-------------|----------------|---------|-----|------------|-------------|------------|------|------|
| Drug dose                    | 0.53        | 0.10           | 0.00    | *** | 0.34       | 0.72        | 0          | 0.01 | 0.01 |
| Positron emission tomography | 0.31        | 0.15           | 0.04    | *   | 0.02       | 0.59        | 0          | 0.01 | 0.01 |
| Time of measuring            | -0.23       | 0.10           | 0.02    | *   | -0.42      | -0.04       | 0          | 0.01 | 0.01 |
| Emotional Excitability (EWL) | 0.30        | 0.11           | 0.01    | **  | 0.08       | 0.51        | 224        | 0.32 | 0.46 |
| Hallucinogen-naïve           | 0.18        | 0.10           | 0.09    |     | -0.03      | 0.38        | 40         | 0.12 | 0.14 |

Note. HPD = Highest Posterior Density. CI = Confidence Interval. FMI = Fraction of missing information. RIV = Relative increase in variance due to missingness.

*Model selection for the dependent variable  $\sqrt{\text{Visionary Restructuralization}}$*

| Predictors                             | Step 1 (%) | Models selected in step 2 (the first 10 models are shown)* |       |       |       |       |       |       |       |       |        |
|----------------------------------------|------------|------------------------------------------------------------|-------|-------|-------|-------|-------|-------|-------|-------|--------|
|                                        |            | 1 (6)                                                      | 2 (7) | 3 (5) | 4 (5) | 5 (6) | 6 (6) | 7 (5) | 8 (4) | 9 (6) | 10 (4) |
| 1. Drug dose                           | 100.0      | ✓                                                          | ✓     | ✓     | ✓     | ✓     | ✓     | ✓     | ✓     | ✓     | ✓      |
| 2. Hallucinogen-naïve                  | 92.8       | ✓                                                          | ✓     | ✓     | ✓     | ✓     | ✓     | –     | ✓     | ✓     | ✓      |
| 3. Absorption (TAS)                    | 92.3       | ✓                                                          | ✓     | ✓     | ✓     | ✓     | ✓     | ✓     | ✓     | ✓     | ✓      |
| 4. Performance-Related Activity (EWL)  | 92.0       | ✓                                                          | ✓     | ✓     | ✓     | ✓     | ✓     | ✓     | –     | –     | –      |
| 5. General Inactivation (EWL)          | 67.3       | ✓                                                          | ✓     | ✓     | –     | ✓     | –     | ✓     | –     | ✓     | –      |
| 6. Emotional Excitability (EWL)        | 56.8       | ✓                                                          | ✓     | –     | ✓     | –     | ✓     | ✓     | –     | ✓     | ✓      |
| 7. Alcohol frequency                   | 54.2       | –                                                          | ✓     | –     | –     | ✓     | ✓     | –     | –     | ✓     | –      |
| 8. Extroversion-Introversion (EWL)     | 48.9       |                                                            |       |       |       |       |       |       |       |       |        |
| 9. Sociability (ZKPQ)                  | 47.9       |                                                            |       |       |       |       |       |       |       |       |        |
| 10. Activity (ZKPQ)                    | 46.9       |                                                            |       |       |       |       |       |       |       |       |        |
| 11. Global Severity Index (SCL-90-R)   | 46.8       |                                                            |       |       |       |       |       |       |       |       |        |
| 12. General Well-Being (EWL)           | 46.4       |                                                            |       |       |       |       |       |       |       |       |        |
| 13. Anxiety-Depressiveness (EWL)       | 40.1       |                                                            |       |       |       |       |       |       |       |       |        |
| 14. Positron emission tomography       | 38.6       |                                                            |       |       |       |       |       |       |       |       |        |
| 15. Impulsive Sensation Seeking (ZKPQ) | 34.8       |                                                            |       |       |       |       |       |       |       |       |        |
| 16. Aggression-Hostility (ZKPQ)        | 30.2       |                                                            |       |       |       |       |       |       |       |       |        |
| 17. Neuroticism-Anxiety (ZKPQ)         | 26.2       |                                                            |       |       |       |       |       |       |       |       |        |
| 18. THC frequency                      | 21.1       |                                                            |       |       |       |       |       |       |       |       |        |
| 19. Years of education                 | 16.0       |                                                            |       |       |       |       |       |       |       |       |        |
| 20. Time of measuring                  | 15.5       |                                                            |       |       |       |       |       |       |       |       |        |
| 21. Age                                | 14.0       |                                                            |       |       |       |       |       |       |       |       |        |
| 22. Daily smoker                       | 13.4       |                                                            |       |       |       |       |       |       |       |       |        |
| 23. Body mass index                    | 10.3       |                                                            |       |       |       |       |       |       |       |       |        |
| 24. Female                             | 5.4        |                                                            |       |       |       |       |       |       |       |       |        |
| Model selection frequency (%)          |            | 21.7                                                       | 17.9  | 10.1  | 9.2   | 8.6   | 3.1   | 2.8   | 2.4   | 2.1   | 1.8    |

✓, variables included in the model; –, variables not selected.

\* The number of variables in the model is given within parentheses.

*Pooled parameter estimates of the best model for the dependent variable  $\sqrt{\text{Visionary Restructuralization}}$*

| Predictors                         | Coefficient | Standard error | P-value |     | HPD CI low | HPD CI high | n missings | FMI  | RIV  |
|------------------------------------|-------------|----------------|---------|-----|------------|-------------|------------|------|------|
| Drug dose                          | 0.71        | 0.09           | 0.00    | *** | 0.52       | 0.88        | 0          | 0.08 | 0.09 |
| Hallucinogen-naïve                 | 0.22        | 0.11           | 0.04    | *   | 0.01       | 0.43        | 40         | 0.25 | 0.32 |
| Absorption (TAS)                   | 0.38        | 0.13           | 0.00    | **  | 0.12       | 0.63        | 312        | 0.53 | 1.08 |
| Performance-Related Activity (EWL) | 0.38        | 0.12           | 0.00    | *** | 0.15       | 0.61        | 224        | 0.40 | 0.63 |
| General Inactivation (EWL)         | 0.14        | 0.11           | 0.19    |     | -0.07      | 0.36        | 224        | 0.31 | 0.44 |
| Emotional Excitability (EWL)       | 0.23        | 0.12           | 0.05    | *   | 0.00       | 0.46        | 224        | 0.45 | 0.78 |

Note. HPD = Highest Posterior Density. CI = Confidence Interval. FMI = Fraction of missing information. RIV = Relative increase in variance due to missingness.

Model selection for the dependent variable  $\sqrt{\text{Experience of Unity}}$

| Predictors                             | Step 1 (%) | Models selected in step 2 (the first 10 models are shown)* |       |        |        |       |        |        |        |        |         |
|----------------------------------------|------------|------------------------------------------------------------|-------|--------|--------|-------|--------|--------|--------|--------|---------|
|                                        |            | 1 (11)                                                     | 2 (8) | 3 (11) | 4 (11) | 5 (9) | 6 (10) | 7 (10) | 8 (12) | 9 (10) | 10 (11) |
| 1. Drug dose                           | 100.0      | ✓                                                          | ✓     | ✓      | ✓      | ✓     | ✓      | ✓      | ✓      | ✓      | ✓       |
| 2. Positron emission tomography        | 92.2       | ✓                                                          | ✓     | ✓      | ✓      | ✓     | ✓      | ✓      | ✓      | ✓      | ✓       |
| 3. Absorption (TAS)                    | 90.2       | ✓                                                          | ✓     | ✓      | ✓      | ✓     | ✓      | ✓      | ✓      | ✓      | ✓       |
| 4. Performance-Related Activity (EWL)  | 87.2       | ✓                                                          | -     | ✓      | ✓      | ✓     | ✓      | ✓      | ✓      | ✓      | ✓       |
| 5. Emotional Excitability (EWL)        | 81.5       | ✓                                                          | ✓     | ✓      | ✓      | ✓     | ✓      | ✓      | ✓      | ✓      | ✓       |
| 6. Time of measuring                   | 80.8       | ✓                                                          | ✓     | ✓      | ✓      | ✓     | ✓      | ✓      | ✓      | ✓      | ✓       |
| 7. General Inactivation (EWL)          | 79.2       | ✓                                                          | ✓     | ✓      | ✓      | -     | ✓      | ✓      | ✓      | -      | ✓       |
| 8. Global Severity Index (SCL-90-R)    | 76.1       | ✓                                                          | -     | ✓      | ✓      | ✓     | ✓      | -      | ✓      | ✓      | ✓       |
| 9. General Well-Being (EWL)            | 75.8       | ✓                                                          | ✓     | ✓      | ✓      | -     | ✓      | ✓      | ✓      | ✓      | ✓       |
| 10. Hallucinogen-naïve                 | 72.0       | ✓                                                          | ✓     | ✓      | ✓      | ✓     | ✓      | ✓      | ✓      | ✓      | ✓       |
| 11. Extroversion-Introversion (EWL)    | 68.7       | -                                                          | -     | -      | ✓      | -     | -      | -      | -      | ✓      | -       |
| 12. Anxiety-Depressiveness (EWL)       | 66.8       | -                                                          | -     | ✓      | -      | ✓     | -      | -      | -      | -      | -       |
| 13. Sociability (ZKPQ)                 | 64.9       | -                                                          | -     | -      | -      | -     | -      | -      | -      | -      | -       |
| 14. Age                                | 64.5       | -                                                          | -     | -      | -      | -     | -      | -      | -      | -      | -       |
| 15. Activity (ZKPQ)                    | 59.6       | ✓                                                          | -     | -      | -      | -     | -      | -      | ✓      | -      | -       |
| 16. Aggression-Hostility (ZKPQ)        | 58.9       | -                                                          | -     | -      | -      | -     | -      | -      | -      | -      | ✓       |
| 17. Impulsive Sensation Seeking (ZKPQ) | 57.9       | -                                                          | -     | -      | -      | -     | -      | -      | ✓      | -      | -       |
| 18. Neuroticism-Anxiety (ZKPQ)         | 55.1       | -                                                          | -     | -      | -      | -     | -      | ✓      | -      | -      | -       |
| 19. Female                             | 49.3       |                                                            |       |        |        |       |        |        |        |        |         |
| 20. Alcohol frequency                  | 41.7       |                                                            |       |        |        |       |        |        |        |        |         |
| 21. Daily smoker                       | 37.8       |                                                            |       |        |        |       |        |        |        |        |         |
| 22. Years of education                 | 31.6       |                                                            |       |        |        |       |        |        |        |        |         |
| 23. Body mass index                    | 29.9       |                                                            |       |        |        |       |        |        |        |        |         |
| 24. THC frequency                      | 23.7       |                                                            |       |        |        |       |        |        |        |        |         |
| Model selection frequency (%)          |            | 0.5                                                        | 0.3   | 0.3    | 0.3    | 0.2   | 0.2    | 0.2    | 0.2    | 0.2    | 0.2     |

✓, variables included in the model; -, variables not selected.

\* The number of variables in the model is given within parentheses.

Pooled parameter estimates of the best model for the dependent variable  $\sqrt{\text{Experience of Unity}}$

| Predictors                         | Coefficient | Standard error | P-value  | HPD CI low | HPD CI high | n missings | FMI  | RIV  |
|------------------------------------|-------------|----------------|----------|------------|-------------|------------|------|------|
| Drug dose                          | 0.53        | 0.10           | 0.00 *** | 0.33       | 0.73        | 0          | 0.09 | 0.09 |
| Positron emission tomography       | -0.12       | 0.21           | 0.58     | -0.54      | 0.28        | 0          | 0.47 | 0.83 |
| Absorption (TAS)                   | 0.46        | 0.14           | 0.00 *** | 0.18       | 0.73        | 312        | 0.48 | 0.89 |
| Performance-Related Activity (EWL) | 0.27        | 0.14           | 0.04 *   | 0.00       | 0.54        | 224        | 0.34 | 0.50 |
| Emotional Excitability (EWL)       | 0.21        | 0.13           | 0.11     | -0.05      | 0.45        | 224        | 0.44 | 0.74 |
| Time of measuring                  | 0.07        | 0.10           | 0.51     | -0.13      | 0.27        | 0          | 0.11 | 0.12 |
| General Inactivation (EWL)         | 0.16        | 0.12           | 0.19     | -0.08      | 0.39        | 224        | 0.31 | 0.44 |
| Global Severity Index (SCL-90-R)   | -0.22       | 0.12           | 0.06     | -0.45      | 0.01        | 111        | 0.31 | 0.44 |
| General Well-Being (EWL)           | 0.06        | 0.14           | 0.64     | -0.20      | 0.34        | 224        | 0.37 | 0.57 |
| Hallucinogen-naïve                 | 0.02        | 0.11           | 0.84     | -0.19      | 0.23        | 40         | 0.12 | 0.13 |
| Activity (ZKPQ)                    | -0.10       | 0.11           | 0.39     | -0.32      | 0.12        | 182        | 0.26 | 0.34 |

Note. HPD = Highest Posterior Density. CI = Confidence Interval. FMI = Fraction of missing information. RIV = Relative increase in variance due to missingness.

*Model selection for the dependent variable log(Spiritual Experience)*

| Predictors                             | Step 1 (%) | Models selected in step 2 (the first 10 models are shown)* |        |        |        |        |        |        |        |       |         |
|----------------------------------------|------------|------------------------------------------------------------|--------|--------|--------|--------|--------|--------|--------|-------|---------|
|                                        |            | 1 (11)                                                     | 2 (12) | 3 (10) | 4 (12) | 5 (13) | 6 (10) | 7 (12) | 8 (12) | 9 (9) | 10 (13) |
| 1. Drug dose                           | 100.0      | ✓                                                          | ✓      | ✓      | ✓      | ✓      | ✓      | ✓      | ✓      | ✓     | ✓       |
| 2. Absorption (TAS)                    | 98.4       | ✓                                                          | ✓      | ✓      | ✓      | ✓      | ✓      | ✓      | ✓      | ✓     | ✓       |
| 3. General Inactivation (EWL)          | 90.7       | ✓                                                          | ✓      | ✓      | ✓      | ✓      | ✓      | ✓      | ✓      | ✓     | ✓       |
| 4. Emotional Excitability (EWL)        | 90.6       | ✓                                                          | ✓      | ✓      | ✓      | ✓      | ✓      | ✓      | ✓      | ✓     | ✓       |
| 5. Performance-Related Activity (EWL)  | 90.2       | ✓                                                          | ✓      | ✓      | ✓      | ✓      | ✓      | ✓      | ✓      | ✓     | ✓       |
| 6. Hallucinogen-naïve                  | 86.6       | ✓                                                          | ✓      | ✓      | ✓      | ✓      | ✓      | ✓      | ✓      | ✓     | ✓       |
| 7. Time of measuring                   | 76.9       | ✓                                                          | ✓      | ✓      | ✓      | ✓      | ✓      | ✓      | ✓      | ✓     | ✓       |
| 8. Activity (ZKPQ)                     | 75.0       | ✓                                                          | ✓      | ✓      | ✓      | ✓      | -      | ✓      | -      | ✓     | ✓       |
| 9. Extroversion-Introversion (EWL)     | 74.4       | ✓                                                          | ✓      | -      | ✓      | ✓      | -      | ✓      | -      | -     | ✓       |
| 10. Global Severity Index (SCL-90-R)   | 73.5       | ✓                                                          | ✓      | ✓      | ✓      | ✓      | ✓      | ✓      | ✓      | ✓     | ✓       |
| 11. General Well-Being (EWL)           | 68.9       | -                                                          | -      | -      | ✓      | ✓      | -      | -      | ✓      | -     | ✓       |
| 12. Sociability (ZKPQ)                 | 68.2       | ✓                                                          | ✓      | ✓      | ✓      | ✓      | ✓      | ✓      | ✓      | -     | ✓       |
| 13. Anxiety-Depressiveness (EWL)       | 66.4       | -                                                          | -      | -      | -      | -      | -      | ✓      | ✓      | -     | ✓       |
| 14. Positron emission tomography       | 63.6       | -                                                          | -      | -      | -      | -      | ✓      | -      | ✓      | -     | -       |
| 15. Aggression-Hostility (ZKPQ)        | 56.4       | -                                                          | ✓      | -      | -      | ✓      | -      | -      | -      | -     | -       |
| 16. Impulsive Sensation Seeking (ZKPQ) | 53.8       | -                                                          | -      | -      | -      | -      | -      | -      | -      | -     | -       |
| 17. THC frequency                      | 48.5       |                                                            |        |        |        |        |        |        |        |       |         |
| 18. Alcohol frequency                  | 47.4       |                                                            |        |        |        |        |        |        |        |       |         |
| 19. Neuroticism-Anxiety (ZKPQ)         | 44.5       |                                                            |        |        |        |        |        |        |        |       |         |
| 20. Female                             | 44.2       |                                                            |        |        |        |        |        |        |        |       |         |
| 21. Daily smoker                       | 42.3       |                                                            |        |        |        |        |        |        |        |       |         |
| 22. Years of education                 | 37.9       |                                                            |        |        |        |        |        |        |        |       |         |
| 23. Age                                | 37.5       |                                                            |        |        |        |        |        |        |        |       |         |
| 24. Body mass index                    | 33.8       |                                                            |        |        |        |        |        |        |        |       |         |
| Model selection frequency (%)          |            | 0.9                                                        | 0.6    | 0.6    | 0.5    | 0.5    | 0.5    | 0.5    | 0.5    | 0.4   | 0.4     |

✓, variables included in the model; -, variables not selected.

\* The number of variables in the model is given within parentheses.

*Pooled parameter estimates of the best model for the dependent variable log(Spiritual Experience)*

| Predictors                         | Coefficient | Standard error | P-value |     | HPD CI low | HPD CI high | n missings | FMI  | RIV  |
|------------------------------------|-------------|----------------|---------|-----|------------|-------------|------------|------|------|
| Drug dose                          | 0.41        | 0.10           | 0.00    | *** | 0.21       | 0.60        | 0          | 0.16 | 0.19 |
| Absorption (TAS)                   | 0.48        | 0.16           | 0.00    | **  | 0.17       | 0.78        | 312        | 0.66 | 1.83 |
| General Inactivation (EWL)         | 0.20        | 0.12           | 0.12    |     | -0.05      | 0.44        | 224        | 0.37 | 0.56 |
| Emotional Excitability (EWL)       | 0.46        | 0.12           | 0.00    | *** | 0.23       | 0.69        | 224        | 0.39 | 0.61 |
| Performance-Related Activity (EWL) | 0.20        | 0.15           | 0.19    |     | -0.10      | 0.49        | 224        | 0.49 | 0.92 |
| Hallucinogen-naïve                 | -0.08       | 0.11           | 0.43    |     | -0.30      | 0.12        | 40         | 0.18 | 0.22 |
| Time of measuring                  | 0.27        | 0.10           | 0.01    | **  | 0.08       | 0.47        | 0          | 0.18 | 0.21 |
| Activity (ZKPQ)                    | -0.12       | 0.11           | 0.28    |     | -0.34      | 0.10        | 182        | 0.30 | 0.42 |
| Extroversion-Introversion (EWL)    | 0.02        | 0.14           | 0.88    |     | -0.25      | 0.30        | 224        | 0.35 | 0.51 |
| Global Severity Index (SCL-90-R)   | -0.17       | 0.11           | 0.14    |     | -0.39      | 0.06        | 111        | 0.34 | 0.50 |
| Sociability (ZKPQ)                 | -0.25       | 0.10           | 0.02    | *   | -0.45      | -0.04       | 182        | 0.24 | 0.31 |

Note. HPD = Highest Posterior Density. CI = Confidence Interval. FMI = Fraction of missing information. RIV = Relative increase in variance due to missingness.

Model selection for the dependent variable  $\sqrt{\text{Blissful State}}$

| Predictors                             | Step 1 (%) | Models selected in step 2 (the first 10 models are shown)* |        |        |        |        |        |        |        |        |         |
|----------------------------------------|------------|------------------------------------------------------------|--------|--------|--------|--------|--------|--------|--------|--------|---------|
|                                        |            | 1 (13)                                                     | 2 (10) | 3 (12) | 4 (13) | 5 (11) | 6 (10) | 7 (13) | 8 (14) | 9 (14) | 10 (15) |
| 1. Drug dose                           | 100.0      | ✓                                                          | ✓      | ✓      | ✓      | ✓      | ✓      | ✓      | ✓      | ✓      | ✓       |
| 2. Performance-Related Activity (EWL)  | 98.2       | ✓                                                          | ✓      | ✓      | ✓      | ✓      | ✓      | ✓      | ✓      | ✓      | ✓       |
| 3. Hallucinogen-naïve                  | 97.8       | ✓                                                          | ✓      | ✓      | ✓      | ✓      | ✓      | ✓      | ✓      | ✓      | ✓       |
| 4. Absorption (TAS)                    | 95.8       | ✓                                                          | ✓      | ✓      | ✓      | ✓      | ✓      | ✓      | ✓      | ✓      | ✓       |
| 5. General Inactivation (EWL)          | 95.7       | ✓                                                          | ✓      | ✓      | ✓      | ✓      | ✓      | ✓      | ✓      | ✓      | ✓       |
| 6. Global Severity Index (SCL-90-R)    | 79.5       | ✓                                                          | ✓      | ✓      | ✓      | -      | -      | ✓      | ✓      | ✓      | ✓       |
| 7. Alcohol frequency                   | 77.6       | ✓                                                          | ✓      | ✓      | ✓      | ✓      | ✓      | ✓      | ✓      | ✓      | ✓       |
| 8. THC frequency                       | 76.5       | ✓                                                          | ✓      | ✓      | ✓      | ✓      | ✓      | ✓      | ✓      | ✓      | ✓       |
| 9. Emotional Excitability (EWL)        | 75.5       | ✓                                                          | ✓      | ✓      | ✓      | ✓      | ✓      | ✓      | ✓      | ✓      | ✓       |
| 10. General Well-Being (EWL)           | 72.9       | ✓                                                          | -      | ✓      | ✓      | ✓      | -      | ✓      | ✓      | ✓      | ✓       |
| 11. Extroversion-Introversion (EWL)    | 71.5       | ✓                                                          | -      | -      | ✓      | -      | -      | -      | ✓      | ✓      | -       |
| 12. Sociability (ZKPQ)                 | 67.7       | -                                                          | -      | -      | -      | -      | -      | -      | -      | -      | ✓       |
| 13. Positron emission tomography       | 64.9       | -                                                          | ✓      | -      | ✓      | -      | -      | -      | -      | ✓      | ✓       |
| 14. Anxiety-Depressiveness (EWL)       | 64.5       | -                                                          | -      | -      | -      | -      | -      | ✓      | ✓      | -      | ✓       |
| 15. Activity (ZKPQ)                    | 62.3       | -                                                          | -      | -      | -      | -      | -      | -      | -      | -      | -       |
| 16. Impulsive Sensation Seeking (ZKPQ) | 57.9       | -                                                          | -      | -      | ✓      | -      | -      | -      | -      | -      | -       |
| 17. Years of education                 | 57.8       | ✓                                                          | -      | ✓      | -      | ✓      | ✓      | ✓      | ✓      | ✓      | ✓       |
| 18. Age                                | 56.9       | ✓                                                          | -      | ✓      | -      | ✓      | ✓      | ✓      | ✓      | ✓      | ✓       |
| 19. Aggression-Hostility (ZKPQ)        | 48.9       |                                                            |        |        |        |        |        |        |        |        |         |
| 20. Daily smoker                       | 48.7       |                                                            |        |        |        |        |        |        |        |        |         |
| 21. Neuroticism-Anxiety (ZKPQ)         | 48.5       |                                                            |        |        |        |        |        |        |        |        |         |
| 22. Time of measuring                  | 27.1       |                                                            |        |        |        |        |        |        |        |        |         |
| 23. Body mass index                    | 22.1       |                                                            |        |        |        |        |        |        |        |        |         |
| 24. Female                             | 20.9       |                                                            |        |        |        |        |        |        |        |        |         |
| Model selection frequency (%)          |            | 0.4                                                        | 0.4    | 0.4    | 0.3    | 0.3    | 0.3    | 0.3    | 0.3    | 0.3    | 0.3     |

✓, variables included in the model; -, variables not selected.

\* The number of variables in the model is given within parentheses.

Pooled parameter estimates of the best model for the dependent variable  $\sqrt{\text{Blissful State}}$

| Predictors                         | Coefficient | Standard error | P-value  | HPD CI low | HPD CI high | n missings | FMI  | RIV  |
|------------------------------------|-------------|----------------|----------|------------|-------------|------------|------|------|
| Drug dose                          | 0.54        | 0.10           | 0.00 *** | 0.34       | 0.74        | 0          | 0.10 | 0.10 |
| Performance-Related Activity (EWL) | 0.30        | 0.14           | 0.03 *   | 0.02       | 0.58        | 224        | 0.34 | 0.50 |
| Hallucinogen-naïve                 | 0.17        | 0.11           | 0.11     | -0.04      | 0.39        | 40         | 0.11 | 0.12 |
| Absorption (TAS)                   | 0.02        | 0.16           | 0.89     | -0.30      | 0.33        | 312        | 0.46 | 0.82 |
| General Inactivation (EWL)         | 0.24        | 0.13           | 0.08     | -0.03      | 0.49        | 224        | 0.38 | 0.59 |
| Global Severity Index (SCL-90-R)   | -0.26       | 0.11           | 0.02 *   | -0.48      | -0.04       | 111        | 0.22 | 0.27 |
| Alcohol frequency                  | 0.16        | 0.11           | 0.14     | -0.06      | 0.38        | 83         | 0.24 | 0.31 |
| THC sometimes vs rarely            | 0.33        | 0.11           | 0.00 **  | 0.11       | 0.55        | 47         | 0.09 | 0.10 |
| THC rarely vs never                | 0.02        | 0.15           | 0.89     | -0.28      | 0.32        | 47         | 0.23 | 0.28 |
| Emotional Excitability (EWL)       | 0.19        | 0.12           | 0.11     | -0.04      | 0.42        | 224        | 0.32 | 0.46 |
| General Well-Being (EWL)           | 0.22        | 0.16           | 0.15     | -0.09      | 0.53        | 224        | 0.44 | 0.74 |
| Extroversion-Introversion (EWL)    | -0.14       | 0.19           | 0.45     | -0.51      | 0.22        | 224        | 0.53 | 1.07 |
| Years of education                 | -0.19       | 0.13           | 0.13     | -0.45      | 0.06        | 0          | 0.24 | 0.30 |
| Age                                | 0.22        | 0.11           | 0.06     | -0.01      | 0.44        | 0          | 0.15 | 0.17 |

Note. HPD = Highest Posterior Density. CI = Confidence Interval. FMI = Fraction of missing information. RIV = Relative increase in variance due to missingness.

*Model selection for the dependent variable log(Insightfulness)*

| Predictors                             | Step 1 (%) | Models selected in step 2 (the first 10 models are shown)* |       |       |       |       |       |       |        |       |        |
|----------------------------------------|------------|------------------------------------------------------------|-------|-------|-------|-------|-------|-------|--------|-------|--------|
|                                        |            | 1 (8)                                                      | 2 (8) | 3 (9) | 4 (9) | 5 (9) | 6 (8) | 7 (8) | 8 (10) | 9 (8) | 10 (7) |
| 1. Drug dose                           | 100.0      | ✓                                                          | ✓     | ✓     | ✓     | ✓     | ✓     | ✓     | ✓      | ✓     | ✓      |
| 2. Absorption (TAS)                    | 94.9       | ✓                                                          | ✓     | ✓     | ✓     | ✓     | ✓     | ✓     | ✓      | ✓     | ✓      |
| 3. Performance-Related Activity (EWL)  | 91.3       | ✓                                                          | ✓     | ✓     | ✓     | ✓     | ✓     | ✓     | ✓      | ✓     | ✓      |
| 4. General Inactivation (EWL)          | 89.7       | ✓                                                          | ✓     | ✓     | ✓     | ✓     | ✓     | ✓     | ✓      | ✓     | ✓      |
| 5. Hallucinogen-naïve                  | 87.8       | ✓                                                          | ✓     | ✓     | ✓     | ✓     | ✓     | ✓     | ✓      | ✓     | ✓      |
| 6. Emotional Excitability (EWL)        | 84.2       | ✓                                                          | ✓     | ✓     | ✓     | ✓     | ✓     | ✓     | ✓      | ✓     | ✓      |
| 7. Activity (ZKPQ)                     | 72.1       | ✓                                                          | ✓     | ✓     | -     | ✓     | -     | -     | ✓      | -     | -      |
| 8. Positron emission tomography        | 71.8       | ✓                                                          | -     | ✓     | ✓     | ✓     | -     | -     | -      | ✓     | -      |
| 9. Neuroticism-Anxiety (ZKPQ)          | 66.9       | -                                                          | ✓     | -     | ✓     | ✓     | ✓     | ✓     | ✓      | -     | ✓      |
| 10. General Well-Being (EWL)           | 65.9       | -                                                          | -     | -     | -     | -     | -     | -     | -      | -     | -      |
| 11. Anxiety-Depressiveness (EWL)       | 64.6       | -                                                          | -     | -     | -     | -     | -     | ✓     | -      | -     | -      |
| 12. Extroversion-Introversion (EWL)    | 62.2       | -                                                          | -     | -     | -     | -     | -     | -     | -      | -     | -      |
| 13. Impulsive Sensation Seeking (ZKPQ) | 61.4       | -                                                          | -     | -     | -     | -     | -     | -     | ✓      | -     | -      |
| 14. Aggression-Hostility (ZKPQ)        | 56.1       | -                                                          | -     | -     | ✓     | -     | -     | -     | -      | -     | -      |
| 15. Female                             | 55.7       | -                                                          | -     | ✓     | -     | -     | ✓     | -     | ✓      | ✓     | -      |
| 16. Global Severity Index (SCL-90-R)   | 55.2       | -                                                          | -     | -     | -     | -     | -     | -     | -      | -     | -      |
| 17. Sociability (ZKPQ)                 | 47.7       |                                                            |       |       |       |       |       |       |        |       |        |
| 18. Alcohol frequency                  | 45.2       |                                                            |       |       |       |       |       |       |        |       |        |
| 19. THC frequency                      | 34.2       |                                                            |       |       |       |       |       |       |        |       |        |
| 20. Daily smoker                       | 30.6       |                                                            |       |       |       |       |       |       |        |       |        |
| 21. Age                                | 30.1       |                                                            |       |       |       |       |       |       |        |       |        |
| 22. Years of education                 | 29.7       |                                                            |       |       |       |       |       |       |        |       |        |
| 23. Time of measuring                  | 28.8       |                                                            |       |       |       |       |       |       |        |       |        |
| 24. Body mass index                    | 24.3       |                                                            |       |       |       |       |       |       |        |       |        |
| Model selection frequency (%)          |            | 0.6                                                        | 0.5   | 0.5   | 0.5   | 0.4   | 0.4   | 0.4   | 0.4    | 0.4   | 0.4    |

✓, variables included in the model; -, variables not selected.

\* The number of variables in the model is given within parentheses.

*Pooled parameter estimates of the best model for the dependent variable log(Insightfulness)*

| Predictors                         | Coefficient | Standard error | P-value  | HPD CI low | HPD CI high | n missings | FMI  | RIV  |
|------------------------------------|-------------|----------------|----------|------------|-------------|------------|------|------|
| Drug dose                          | 0.48        | 0.10           | 0.00 *** | 0.29       | 0.67        | 0          | 0.07 | 0.08 |
| Absorption (TAS)                   | 0.36        | 0.13           | 0.00 **  | 0.11       | 0.60        | 312        | 0.37 | 0.58 |
| Performance-Related Activity (EWL) | 0.25        | 0.13           | 0.06     | -0.01      | 0.51        | 224        | 0.43 | 0.72 |
| General Inactivation (EWL)         | 0.21        | 0.12           | 0.09     | -0.03      | 0.44        | 224        | 0.34 | 0.50 |
| Hallucinogen-naïve                 | 0.20        | 0.11           | 0.06     | -0.01      | 0.42        | 40         | 0.16 | 0.19 |
| Emotional Excitability (EWL)       | 0.26        | 0.11           | 0.02 *   | 0.04       | 0.48        | 224        | 0.32 | 0.46 |
| Activity (ZKPQ)                    | -0.20       | 0.12           | 0.10     | -0.42      | 0.04        | 182        | 0.36 | 0.53 |
| Positron emission tomography       | 0.19        | 0.18           | 0.27     | -0.16      | 0.53        | 0          | 0.31 | 0.43 |

Note. HPD = Highest Posterior Density. CI = Confidence Interval. FMI = Fraction of missing information. RIV = Relative increase in variance due to missingness.

Model selection for the dependent variable log(Disembodiment)

| Predictors                             | Step 1 (%) | Models selected in step 2 (the first 10 models are shown)* |        |        |        |        |        |        |        |        |         |
|----------------------------------------|------------|------------------------------------------------------------|--------|--------|--------|--------|--------|--------|--------|--------|---------|
|                                        |            | 1 (16)                                                     | 2 (15) | 3 (15) | 4 (14) | 5 (13) | 6 (14) | 7 (15) | 8 (15) | 9 (17) | 10 (14) |
| 1. Drug dose                           | 100.0      | ✓                                                          | ✓      | ✓      | ✓      | ✓      | ✓      | ✓      | ✓      | ✓      | ✓       |
| 2. Absorption (TAS)                    | 99.5       | ✓                                                          | ✓      | ✓      | ✓      | ✓      | ✓      | ✓      | ✓      | ✓      | ✓       |
| 3. General Inactivation (EWL)          | 95.2       | ✓                                                          | ✓      | ✓      | ✓      | ✓      | ✓      | ✓      | ✓      | ✓      | ✓       |
| 4. Emotional Excitability (EWL)        | 94.8       | ✓                                                          | ✓      | ✓      | ✓      | ✓      | ✓      | ✓      | ✓      | ✓      | ✓       |
| 5. Performance-Related Activity (EWL)  | 94.3       | ✓                                                          | ✓      | ✓      | ✓      | ✓      | ✓      | ✓      | ✓      | ✓      | ✓       |
| 6. Hallucinogen-naïve                  | 94.3       | ✓                                                          | ✓      | ✓      | ✓      | ✓      | ✓      | ✓      | ✓      | ✓      | ✓       |
| 7. Extroversion-Introversion (EWL)     | 86.1       | ✓                                                          | ✓      | ✓      | ✓      | ✓      | ✓      | ✓      | ✓      | ✓      | ✓       |
| 8. Positron emission tomography        | 84.1       | ✓                                                          | ✓      | ✓      | –      | ✓      | ✓      | ✓      | ✓      | ✓      | ✓       |
| 9. General Well-Being (EWL)            | 82.0       | ✓                                                          | ✓      | ✓      | ✓      | ✓      | ✓      | ✓      | ✓      | ✓      | ✓       |
| 10. Time of measuring                  | 81.2       | ✓                                                          | ✓      | ✓      | ✓      | ✓      | ✓      | ✓      | ✓      | ✓      | ✓       |
| 11. Global Severity Index (SCL-90-R)   | 81.0       | ✓                                                          | ✓      | ✓      | ✓      | ✓      | ✓      | ✓      | ✓      | ✓      | ✓       |
| 12. Anxiety-Depressiveness (EWL)       | 81.0       | ✓                                                          | ✓      | ✓      | ✓      | ✓      | ✓      | –      | ✓      | ✓      | ✓       |
| 13. Activity (ZKPQ)                    | 80.5       | ✓                                                          | –      | ✓      | ✓      | –      | ✓      | ✓      | ✓      | ✓      | –       |
| 14. Sociability (ZKPQ)                 | 80.5       | ✓                                                          | ✓      | ✓      | ✓      | ✓      | ✓      | ✓      | ✓      | ✓      | ✓       |
| 15. Aggression-Hostility (ZKPQ)        | 70.5       | ✓                                                          | ✓      | –      | –      | –      | –      | ✓      | ✓      | ✓      | –       |
| 16. Impulsive Sensation Seeking (ZKPQ) | 67.1       | ✓                                                          | ✓      | ✓      | ✓      | –      | –      | ✓      | –      | ✓      | ✓       |
| 17. THC frequency                      | 63.2       | –                                                          | –      | –      | –      | –      | –      | –      | –      | ✓      | –       |
| 18. Alcohol frequency                  | 60.3       | –                                                          | –      | –      | –      | –      | –      | –      | –      | –      | –       |
| 19. Neuroticism-Anxiety (ZKPQ)         | 58.0       | –                                                          | –      | –      | –      | –      | –      | –      | –      | –      | –       |
| 20. Female                             | 54.5       | –                                                          | –      | –      | –      | –      | –      | –      | –      | –      | –       |
| 21. Daily smoker                       | 52.9       | –                                                          | –      | –      | –      | –      | –      | –      | –      | –      | –       |
| 22. Years of education                 | 47.7       |                                                            |        |        |        |        |        |        |        |        |         |
| 23. Age                                | 45.4       |                                                            |        |        |        |        |        |        |        |        |         |
| 24. Body mass index                    | 40.9       |                                                            |        |        |        |        |        |        |        |        |         |
| Model selection frequency (%)          |            | 0.9                                                        | 0.5    | 0.4    | 0.4    | 0.4    | 0.4    | 0.4    | 0.4    | 0.4    | 0.3     |

✓, variables included in the model; –, variables not selected.

\* The number of variables in the model is given within parentheses.

Pooled parameter estimates of the best model for the dependent variable log(Disembodiment)

| Predictors                         | Coefficient | Standard error | P-value |     | HPD CI low | HPD CI high | n missings | FMI  | RIV  |
|------------------------------------|-------------|----------------|---------|-----|------------|-------------|------------|------|------|
| Drug dose                          | 0.41        | 0.10           | 0.00    | *** | 0.21       | 0.61        | 0          | 0.05 | 0.05 |
| Absorption (TAS)                   | 0.27        | 0.13           | 0.04    | *   | 0.01       | 0.53        | 312        | 0.29 | 0.39 |
| General Inactivation (EWL)         | 0.10        | 0.14           | 0.48    |     | -0.19      | 0.38        | 224        | 0.42 | 0.69 |
| Emotional Excitability (EWL)       | 0.12        | 0.14           | 0.38    |     | -0.14      | 0.40        | 224        | 0.39 | 0.61 |
| Performance-Related Activity (EWL) | 0.24        | 0.15           | 0.10    |     | -0.05      | 0.54        | 224        | 0.36 | 0.55 |
| Hallucinogen-naïve                 | 0.25        | 0.11           | 0.03    | *   | 0.03       | 0.46        | 40         | 0.12 | 0.14 |
| Extroversion-Introversion (EWL)    | -0.11       | 0.20           | 0.58    |     | -0.50      | 0.27        | 224        | 0.47 | 0.85 |
| Positron emission tomography       | 0.24        | 0.19           | 0.21    |     | -0.15      | 0.61        | 0          | 0.29 | 0.39 |
| General Well-Being (EWL)           | 0.14        | 0.20           | 0.46    |     | -0.26      | 0.52        | 224        | 0.39 | 0.62 |
| Time of measuring                  | -0.07       | 0.10           | 0.50    |     | -0.27      | 0.13        | 0          | 0.04 | 0.05 |
| Global Severity Index (SCL-90-R)   | -0.16       | 0.13           | 0.21    |     | -0.40      | 0.09        | 111        | 0.33 | 0.48 |
| Anxiety-Depressiveness (EWL)       | 0.08        | 0.14           | 0.58    |     | -0.20      | 0.36        | 224        | 0.31 | 0.43 |
| Activity (ZKPQ)                    | 0.06        | 0.12           | 0.59    |     | -0.17      | 0.29        | 182        | 0.22 | 0.27 |
| Sociability (ZKPQ)                 | 0.04        | 0.13           | 0.74    |     | -0.22      | 0.30        | 182        | 0.34 | 0.50 |
| Aggression-Hostility (ZKPQ)        | 0.16        | 0.13           | 0.21    |     | -0.09      | 0.41        | 182        | 0.36 | 0.55 |
| Impulsive Sensation Seeking (ZKPQ) | 0.00        | 0.16           | 1.00    |     | -0.30      | 0.31        | 182        | 0.32 | 0.45 |

Note. HPD = Highest Posterior Density. CI = Confidence Interval. FMI = Fraction of missing information. RIV = Relative increase in variance due to missingness.

Model selection for the dependent variable  $\sqrt{\text{Impaired Control and Cognition}}$

| Predictors                             | Step 1 (%) | Models selected in step 2 (the first 10 models are shown)* |        |        |        |        |        |        |        |        |         |
|----------------------------------------|------------|------------------------------------------------------------|--------|--------|--------|--------|--------|--------|--------|--------|---------|
|                                        |            | 1 (19)                                                     | 2 (18) | 3 (20) | 4 (17) | 5 (18) | 6 (19) | 7 (20) | 8 (18) | 9 (18) | 10 (17) |
| 1. Drug dose                           | 100.0      | ✓                                                          | ✓      | ✓      | ✓      | ✓      | ✓      | ✓      | ✓      | ✓      | ✓       |
| 2. Hallucinogen-naïve                  | 99.4       | ✓                                                          | ✓      | ✓      | ✓      | ✓      | ✓      | ✓      | ✓      | ✓      | ✓       |
| 3. Performance-Related Activity (EWL)  | 99.2       | ✓                                                          | ✓      | ✓      | ✓      | ✓      | ✓      | ✓      | ✓      | ✓      | ✓       |
| 4. Absorption (TAS)                    | 98.3       | ✓                                                          | ✓      | ✓      | ✓      | ✓      | ✓      | ✓      | ✓      | ✓      | ✓       |
| 5. General Inactivation (EWL)          | 97.3       | ✓                                                          | ✓      | ✓      | ✓      | ✓      | ✓      | ✓      | ✓      | ✓      | ✓       |
| 6. Global Severity Index (SCL-90-R)    | 90.5       | ✓                                                          | ✓      | ✓      | ✓      | ✓      | ✓      | ✓      | ✓      | ✓      | ✓       |
| 7. Time of measuring                   | 87.5       | ✓                                                          | ✓      | ✓      | ✓      | ✓      | ✓      | ✓      | –      | ✓      | ✓       |
| 8. Extroversion-Introversion (EWL)     | 84.7       | ✓                                                          | ✓      | ✓      | ✓      | ✓      | ✓      | ✓      | ✓      | ✓      | ✓       |
| 9. General Well-Being (EWL)            | 84.7       | ✓                                                          | ✓      | ✓      | ✓      | ✓      | ✓      | ✓      | ✓      | ✓      | ✓       |
| 10. Emotional Excitability (EWL)       | 84.5       | ✓                                                          | ✓      | ✓      | ✓      | ✓      | ✓      | ✓      | ✓      | ✓      | ✓       |
| 11. Anxiety-Depressiveness (EWL)       | 82.6       | ✓                                                          | ✓      | ✓      | ✓      | ✓      | ✓      | ✓      | ✓      | ✓      | ✓       |
| 12. Alcohol frequency                  | 82.3       | ✓                                                          | ✓      | ✓      | ✓      | ✓      | ✓      | ✓      | ✓      | ✓      | ✓       |
| 13. Positron emission tomography       | 80.8       | ✓                                                          | ✓      | ✓      | ✓      | ✓      | ✓      | ✓      | ✓      | ✓      | –       |
| 14. Sociability (ZKPQ)                 | 80.3       | ✓                                                          | ✓      | ✓      | ✓      | ✓      | ✓      | ✓      | ✓      | ✓      | ✓       |
| 15. THC frequency                      | 80.1       | ✓                                                          | ✓      | ✓      | ✓      | ✓      | ✓      | ✓      | ✓      | ✓      | ✓       |
| 16. Age                                | 79.8       | ✓                                                          | ✓      | ✓      | ✓      | ✓      | ✓      | ✓      | –      | –      | ✓       |
| 17. Activity (ZKPQ)                    | 73.5       | ✓                                                          | ✓      | ✓      | –      | –      | –      | ✓      | ✓      | ✓      | –       |
| 18. Impulsive Sensation Seeking (ZKPQ) | 72.7       | ✓                                                          | ✓      | ✓      | ✓      | ✓      | ✓      | ✓      | ✓      | ✓      | ✓       |
| 19. Aggression-Hostility (ZKPQ)        | 66.1       | –                                                          | –      | –      | –      | –      | ✓      | ✓      | –      | ✓      | –       |
| 20. Neuroticism-Anxiety (ZKPQ)         | 64.5       | –                                                          | –      | ✓      | –      | –      | –      | –      | –      | –      | –       |
| 21. Years of education                 | 63.2       | ✓                                                          | –      | ✓      | –      | ✓      | ✓      | ✓      | ✓      | –      | ✓       |
| 22. Daily smoker                       | 61.9       | –                                                          | –      | –      | –      | –      | –      | –      | –      | –      | –       |
| 23. Body mass index                    | 42.2       |                                                            |        |        |        |        |        |        |        |        |         |
| 24. Female                             | 42.1       |                                                            |        |        |        |        |        |        |        |        |         |
| Model selection frequency (%)          |            | 0.4                                                        | 0.3    | 0.3    | 0.3    | 0.2    | 0.2    | 0.2    | 0.2    | 0.2    | 0.2     |

✓, variables included in the model; –, variables not selected.

\* The number of variables in the model is given within parentheses.

Pooled parameter estimates of the best model for the dependent variable  $\sqrt{\text{Impaired Control and Cognition}}$

| Predictors                         | Coefficient | Standard error | P-value | HPD CI low | HPD CI high | n missings | FMI | RIV  |      |
|------------------------------------|-------------|----------------|---------|------------|-------------|------------|-----|------|------|
| Drug dose                          | 0.49        | 0.10           | 0.00    | ***        | 0.28        | 0.69       | 0   | 0.05 | 0.06 |
| Hallucinogen-naïve                 | 0.17        | 0.11           | 0.14    |            | -0.05       | 0.38       | 40  | 0.08 | 0.09 |
| Performance-Related Activity (EWL) | 0.15        | 0.16           | 0.36    |            | -0.18       | 0.46       | 224 | 0.48 | 0.89 |
| Absorption (TAS)                   | 0.06        | 0.22           | 0.73    |            | -0.39       | 0.47       | 312 | 0.65 | 1.74 |
| General Inactivation (EWL)         | -0.01       | 0.15           | 0.94    |            | -0.29       | 0.29       | 224 | 0.45 | 0.78 |
| Global Severity Index (SCL-90-R)   | 0.13        | 0.13           | 0.31    |            | -0.12       | 0.38       | 111 | 0.33 | 0.47 |
| Time of measuring                  | -0.22       | 0.10           | 0.03    | *          | -0.43       | -0.03      | 0   | 0.04 | 0.04 |
| Extroversion-Introversion (EWL)    | -0.10       | 0.21           | 0.64    |            | -0.50       | 0.30       | 224 | 0.50 | 0.95 |
| General Well-Being (EWL)           | 0.00        | 0.23           | 0.97    |            | -0.45       | 0.44       | 224 | 0.55 | 1.18 |
| Emotional Excitability (EWL)       | 0.06        | 0.14           | 0.67    |            | -0.22       | 0.34       | 224 | 0.40 | 0.63 |
| Anxiety-Depressiveness (EWL)       | 0.22        | 0.16           | 0.15    |            | -0.08       | 0.53       | 224 | 0.41 | 0.66 |
| Alcohol frequency                  | 0.13        | 0.12           | 0.26    |            | -0.10       | 0.36       | 83  | 0.25 | 0.33 |
| Positron emission tomography       | 0.09        | 0.18           | 0.62    |            | -0.27       | 0.46       | 0   | 0.20 | 0.25 |
| Sociability (ZKPQ)                 | 0.10        | 0.14           | 0.45    |            | -0.16       | 0.37       | 182 | 0.29 | 0.40 |
| THC sometimes vs rarely            | 0.05        | 0.12           | 0.67    |            | -0.18       | 0.28       | 47  | 0.07 | 0.08 |
| THC rarely vs never                | -0.17       | 0.15           | 0.26    |            | -0.48       | 0.13       | 47  | 0.21 | 0.26 |
| Age                                | -0.27       | 0.13           | 0.04    | *          | -0.52       | -0.02      | 0   | 0.20 | 0.24 |
| Activity (ZKPQ)                    | 0.06        | 0.13           | 0.66    |            | -0.21       | 0.32       | 182 | 0.38 | 0.58 |
| Impulsive Sensation Seeking (ZKPQ) | -0.09       | 0.18           | 0.60    |            | -0.43       | 0.26       | 182 | 0.45 | 0.77 |
| Years of education                 | -0.04       | 0.15           | 0.81    |            | -0.34       | 0.26       | 0   | 0.37 | 0.56 |

Note. HPD = Highest Posterior Density. CI = Confidence Interval. FMI = Fraction of missing information. RIV = Relative increase in variance due to missingness.

Model selection for the dependent variable  $\frac{-1}{\sqrt{Anxiety}}$

| Predictors                             | Step 1 (%) | Models selected in step 2 (the first 10 models are shown)* |        |        |        |        |        |        |        |        |         |
|----------------------------------------|------------|------------------------------------------------------------|--------|--------|--------|--------|--------|--------|--------|--------|---------|
|                                        |            | 1 (17)                                                     | 2 (15) | 3 (18) | 4 (15) | 5 (16) | 6 (16) | 7 (15) | 8 (16) | 9 (15) | 10 (14) |
| 1. Drug dose                           | 100.0      | ✓                                                          | ✓      | ✓      | ✓      | ✓      | ✓      | ✓      | ✓      | ✓      | ✓       |
| 2. Positron emission tomography        | 99.7       | ✓                                                          | ✓      | ✓      | ✓      | ✓      | ✓      | ✓      | ✓      | ✓      | ✓       |
| 3. Emotional Excitability (EWL)        | 98.8       | ✓                                                          | ✓      | ✓      | ✓      | ✓      | ✓      | ✓      | ✓      | ✓      | ✓       |
| 4. Absorption (TAS)                    | 97.9       | ✓                                                          | ✓      | ✓      | ✓      | ✓      | ✓      | ✓      | ✓      | ✓      | ✓       |
| 5. Performance-Related Activity (EWL)  | 96.1       | ✓                                                          | ✓      | ✓      | ✓      | ✓      | ✓      | ✓      | ✓      | ✓      | ✓       |
| 6. General Inactivation (EWL)          | 93.2       | ✓                                                          | ✓      | ✓      | ✓      | ✓      | ✓      | ✓      | ✓      | ✓      | ✓       |
| 7. Hallucinogen-naïve                  | 91.5       | ✓                                                          | ✓      | ✓      | ✓      | ✓      | ✓      | ✓      | ✓      | ✓      | ✓       |
| 8. Neuroticism-Anxiety (ZKPQ)          | 81.4       | ✓                                                          | ✓      | ✓      | -      | ✓      | ✓      | ✓      | ✓      | ✓      | ✓       |
| 9. THC frequency                       | 81.3       | ✓                                                          | ✓      | ✓      | ✓      | ✓      | ✓      | ✓      | ✓      | ✓      | ✓       |
| 10. General Well-Being (EWL)           | 80.7       | ✓                                                          | -      | ✓      | ✓      | ✓      | -      | ✓      | ✓      | ✓      | ✓       |
| 11. Activity (ZKPQ)                    | 80.1       | ✓                                                          | ✓      | ✓      | ✓      | ✓      | ✓      | ✓      | ✓      | ✓      | ✓       |
| 12. Anxiety-Depressiveness (EWL)       | 77.6       | ✓                                                          | ✓      | ✓      | ✓      | ✓      | ✓      | ✓      | -      | -      | -       |
| 13. Impulsive Sensation Seeking (ZKPQ) | 76.1       | ✓                                                          | -      | ✓      | ✓      | ✓      | ✓      | ✓      | ✓      | ✓      | ✓       |
| 14. Extroversion-Introversion (EWL)    | 75.0       | ✓                                                          | ✓      | ✓      | ✓      | -      | -      | -      | ✓      | ✓      | -       |
| 15. Aggression-Hostility (ZKPQ)        | 73.1       | ✓                                                          | ✓      | ✓      | -      | ✓      | ✓      | ✓      | -      | -      | ✓       |
| 16. Global Severity Index (SCL-90-R)   | 69.4       | -                                                          | -      | ✓      | -      | ✓      | -      | -      | -      | ✓      | -       |
| 17. Sociability (ZKPQ)                 | 69.0       | ✓                                                          | ✓      | ✓      | ✓      | -      | ✓      | ✓      | ✓      | -      | -       |
| 18. Female                             | 58.9       | ✓                                                          | ✓      | ✓      | ✓      | ✓      | ✓      | -      | -      | ✓      | ✓       |
| 19. Time of measuring                  | 56.8       | -                                                          | -      | -      | -      | -      | ✓      | -      | -      | -      | -       |
| 20. Alcohol frequency                  | 56.3       | -                                                          | -      | -      | -      | -      | -      | -      | -      | -      | -       |
| 21. Daily smoker                       | 48.9       |                                                            |        |        |        |        |        |        |        |        |         |
| 22. Age                                | 48.3       |                                                            |        |        |        |        |        |        |        |        |         |
| 23. Years of education                 | 46.8       |                                                            |        |        |        |        |        |        |        |        |         |
| 24. Body mass index                    | 41.1       |                                                            |        |        |        |        |        |        |        |        |         |
| Model selection frequency (%)          |            | 0.3                                                        | 0.2    | 0.2    | 0.2    | 0.2    | 0.2    | 0.2    | 0.2    | 0.2    | 0.2     |

✓, variables included in the model; -, variables not selected.

\* The number of variables in the model is given within parentheses.

Pooled parameter estimates of the best model for the dependent variable  $\frac{-1}{\sqrt{Anxiety}}$

| Predictors                         | Coefficient | Standard error | P-value  | HPD CI low | HPD CI high | n missings | FMI  | RIV  |
|------------------------------------|-------------|----------------|----------|------------|-------------|------------|------|------|
| Drug dose                          | 0.30        | 0.10           | 0.00 **  | 0.10       | 0.49        | 0          | 0.05 | 0.05 |
| Positron emission tomography       | 0.65        | 0.18           | 0.00 *** | 0.30       | 1.00        | 0          | 0.17 | 0.20 |
| Emotional Excitability (EWL)       | 0.52        | 0.15           | 0.00 *** | 0.23       | 0.83        | 224        | 0.50 | 0.94 |
| Absorption (TAS)                   | 0.07        | 0.14           | 0.63     | -0.21      | 0.35        | 312        | 0.44 | 0.75 |
| Performance-Related Activity (EWL) | 0.11        | 0.15           | 0.44     | -0.18      | 0.39        | 224        | 0.39 | 0.63 |
| General Inactivation (EWL)         | 0.06        | 0.14           | 0.67     | -0.20      | 0.33        | 224        | 0.37 | 0.55 |
| Hallucinogen-naïve                 | 0.12        | 0.11           | 0.27     | -0.09      | 0.34        | 40         | 0.14 | 0.17 |
| Neuroticism-Anxiety (ZKPQ)         | -0.13       | 0.15           | 0.40     | -0.43      | 0.15        | 182        | 0.50 | 0.95 |
| THC sometimes vs rarely            | -0.23       | 0.12           | 0.07     | -0.46      | 0.02        | 47         | 0.23 | 0.28 |
| THC rarely vs never                | 0.21        | 0.15           | 0.16     | -0.08      | 0.49        | 47         | 0.14 | 0.15 |
| General Well-Being (EWL)           | -0.14       | 0.20           | 0.48     | -0.53      | 0.25        | 224        | 0.41 | 0.67 |
| Activity (ZKPQ)                    | -0.06       | 0.14           | 0.68     | -0.33      | 0.21        | 182        | 0.43 | 0.72 |
| Anxiety-Depressiveness (EWL)       | -0.02       | 0.14           | 0.88     | -0.28      | 0.25        | 224        | 0.20 | 0.24 |
| Impulsive Sensation Seeking (ZKPQ) | -0.06       | 0.16           | 0.71     | -0.38      | 0.26        | 182        | 0.40 | 0.65 |
| Extroversion-Introversion (EWL)    | -0.03       | 0.18           | 0.84     | -0.40      | 0.32        | 224        | 0.40 | 0.63 |
| Aggression-Hostility (ZKPQ)        | -0.10       | 0.13           | 0.44     | -0.35      | 0.15        | 182        | 0.32 | 0.45 |
| Sociability (ZKPQ)                 | 0.17        | 0.12           | 0.17     | -0.07      | 0.41        | 182        | 0.23 | 0.29 |
| Female                             | 0.04        | 0.11           | 0.74     | -0.19      | 0.25        | 0          | 0.23 | 0.29 |

Note. HPD = Highest Posterior Density. CI = Confidence Interval. FMI = Fraction of missing information. RIV = Relative increase in variance due to missingness.

Model selection for the dependent variable  $\sqrt{\text{Complex Imagery}}$

| Predictors                             | Step 1 (%) | Models selected in step 2 (the first 10 models are shown)* |        |        |        |        |        |        |        |        |         |
|----------------------------------------|------------|------------------------------------------------------------|--------|--------|--------|--------|--------|--------|--------|--------|---------|
|                                        |            | 1 (18)                                                     | 2 (17) | 3 (16) | 4 (17) | 5 (16) | 6 (17) | 7 (16) | 8 (16) | 9 (17) | 10 (15) |
| 1. Drug dose                           | 100.0      | ✓                                                          | ✓      | ✓      | ✓      | ✓      | ✓      | ✓      | ✓      | ✓      | ✓       |
| 2. Absorption (TAS)                    | 98.6       | ✓                                                          | ✓      | ✓      | ✓      | ✓      | ✓      | ✓      | ✓      | ✓      | ✓       |
| 3. Performance-Related Activity (EWL)  | 97.2       | ✓                                                          | ✓      | ✓      | ✓      | ✓      | ✓      | ✓      | ✓      | ✓      | ✓       |
| 4. Positron emission tomography        | 96.4       | ✓                                                          | ✓      | ✓      | ✓      | ✓      | ✓      | ✓      | ✓      | ✓      | ✓       |
| 5. Hallucinogen-naïve                  | 95.3       | ✓                                                          | ✓      | ✓      | ✓      | ✓      | ✓      | ✓      | ✓      | ✓      | ✓       |
| 6. General Inactivation (EWL)          | 91.3       | ✓                                                          | ✓      | ✓      | ✓      | ✓      | ✓      | ✓      | ✓      | ✓      | ✓       |
| 7. Emotional Excitability (EWL)        | 91.3       | ✓                                                          | ✓      | ✓      | ✓      | ✓      | ✓      | ✓      | ✓      | ✓      | ✓       |
| 8. Global Severity Index (SCL-90-R)    | 90.0       | ✓                                                          | ✓      | ✓      | ✓      | ✓      | ✓      | ✓      | ✓      | ✓      | ✓       |
| 9. Extroversion-Introversion (EWL)     | 87.5       | ✓                                                          | ✓      | ✓      | ✓      | ✓      | ✓      | ✓      | ✓      | ✓      | ✓       |
| 10. General Well-Being (EWL)           | 85.9       | ✓                                                          | ✓      | ✓      | ✓      | ✓      | ✓      | ✓      | ✓      | ✓      | ✓       |
| 11. Time of measuring                  | 84.7       | ✓                                                          | ✓      | ✓      | ✓      | ✓      | ✓      | ✓      | ✓      | ✓      | ✓       |
| 12. Sociability (ZKPQ)                 | 79.2       | ✓                                                          | ✓      | ✓      | ✓      | ✓      | ✓      | ✓      | ✓      | ✓      | ✓       |
| 13. Anxiety-Depressiveness (EWL)       | 78.1       | ✓                                                          | ✓      | ✓      | ✓      | ✓      | ✓      | ✓      | ✓      | ✓      | ✓       |
| 14. Alcohol frequency                  | 77.1       | ✓                                                          | ✓      | ✓      | -      | ✓      | ✓      | ✓      | -      | ✓      | ✓       |
| 15. Impulsive Sensation Seeking (ZKPQ) | 75.1       | ✓                                                          | ✓      | ✓      | ✓      | ✓      | ✓      | -      | ✓      | ✓      | -       |
| 16. Activity (ZKPQ)                    | 73.2       | ✓                                                          | -      | ✓      | ✓      | -      | ✓      | ✓      | ✓      | ✓      | ✓       |
| 17. Aggression-Hostility (ZKPQ)        | 70.0       | ✓                                                          | ✓      | -      | ✓      | ✓      | ✓      | -      | ✓      | -      | -       |
| 18. Age                                | 69.2       | -                                                          | -      | -      | -      | -      | -      | -      | -      | -      | -       |
| 19. Neuroticism-Anxiety (ZKPQ)         | 64.6       | ✓                                                          | ✓      | -      | ✓      | -      | -      | ✓      | -      | ✓      | -       |
| 20. Female                             | 52.0       | -                                                          | -      | -      | -      | -      | -      | -      | -      | -      | -       |
| 21. Daily smoker                       | 48.7       |                                                            |        |        |        |        |        |        |        |        |         |
| 22. THC frequency                      | 45.0       |                                                            |        |        |        |        |        |        |        |        |         |
| 23. Years of education                 | 41.3       |                                                            |        |        |        |        |        |        |        |        |         |
| 24. Body mass index                    | 39.8       |                                                            |        |        |        |        |        |        |        |        |         |
| Model selection frequency (%)          |            | 0.6                                                        | 0.6    | 0.5    | 0.5    | 0.4    | 0.4    | 0.4    | 0.4    | 0.4    | 0.4     |

✓, variables included in the model; -, variables not selected.

\* The number of variables in the model is given within parentheses.

Pooled parameter estimates of the best model for the dependent variable  $\sqrt{\text{Complex Imagery}}$

| Predictors                         | Coefficient | Standard error | P-value |     | HPD CI low | HPD CI high | n missings | FMI  | RIV  |
|------------------------------------|-------------|----------------|---------|-----|------------|-------------|------------|------|------|
| Drug dose                          | 0.47        | 0.10           | 0.00    | *** | 0.26       | 0.67        | 0          | 0.12 | 0.14 |
| Absorption (TAS)                   | 0.45        | 0.15           | 0.00    | **  | 0.15       | 0.73        | 312        | 0.49 | 0.91 |
| Performance-Related Activity (EWL) | 0.40        | 0.15           | 0.00    | **  | 0.12       | 0.69        | 224        | 0.38 | 0.58 |
| Positron emission tomography       | 0.03        | 0.22           | 0.85    |     | -0.43      | 0.45        | 0          | 0.51 | 0.99 |
| Hallucinogen-naïve                 | 0.20        | 0.12           | 0.08    |     | -0.02      | 0.43        | 40         | 0.24 | 0.31 |
| General Inactivation (EWL)         | 0.08        | 0.14           | 0.56    |     | -0.18      | 0.34        | 224        | 0.37 | 0.57 |
| Emotional Excitability (EWL)       | 0.22        | 0.14           | 0.12    |     | -0.06      | 0.47        | 224        | 0.39 | 0.62 |
| Global Severity Index (SCL-90-R)   | -0.25       | 0.12           | 0.04    | *   | -0.49      | -0.01       | 111        | 0.22 | 0.27 |
| Extroversion-Introversion (EWL)    | -0.26       | 0.18           | 0.12    |     | -0.62      | 0.07        | 224        | 0.35 | 0.51 |
| General Well-Being (EWL)           | 0.01        | 0.22           | 0.94    |     | -0.41      | 0.43        | 224        | 0.52 | 1.04 |
| Time of measuring                  | 0.14        | 0.10           | 0.16    |     | -0.06      | 0.34        | 0          | 0.08 | 0.09 |
| Sociability (ZKPQ)                 | 0.13        | 0.13           | 0.31    |     | -0.12      | 0.39        | 182        | 0.38 | 0.58 |
| Anxiety-Depressiveness (EWL)       | 0.07        | 0.15           | 0.65    |     | -0.22      | 0.35        | 224        | 0.36 | 0.55 |
| Alcohol frequency                  | 0.28        | 0.11           | 0.01    | *   | 0.06       | 0.50        | 83         | 0.23 | 0.29 |
| Impulsive Sensation Seeking (ZKPQ) | -0.05       | 0.17           | 0.75    |     | -0.38      | 0.28        | 182        | 0.47 | 0.85 |
| Activity (ZKPQ)                    | -0.03       | 0.12           | 0.79    |     | -0.27      | 0.21        | 182        | 0.34 | 0.49 |
| Aggression-Hostility (ZKPQ)        | 0.06        | 0.12           | 0.62    |     | -0.18      | 0.29        | 182        | 0.24 | 0.31 |
| Neuroticism-Anxiety (ZKPQ)         | -0.03       | 0.13           | 0.81    |     | -0.29      | 0.22        | 182        | 0.22 | 0.28 |

Note. HPD = Highest Posterior Density. CI = Confidence Interval. FMI = Fraction of missing information. RIV = Relative increase in variance due to missingness.

Model selection for the dependent variable  $\sqrt{\text{Elementary Imagery}}$

| Predictors                             | Step 1 (%) | Models selected in step 2 (the first 10 models are shown)* |        |        |        |        |        |        |        |        |         |
|----------------------------------------|------------|------------------------------------------------------------|--------|--------|--------|--------|--------|--------|--------|--------|---------|
|                                        |            | 1 (17)                                                     | 2 (17) | 3 (16) | 4 (18) | 5 (18) | 6 (18) | 7 (19) | 8 (18) | 9 (16) | 10 (17) |
| 1. Drug dose                           | 100.0      | ✓                                                          | ✓      | ✓      | ✓      | ✓      | ✓      | ✓      | ✓      | ✓      | ✓       |
| 2. Absorption (TAS)                    | 99.9       | ✓                                                          | ✓      | ✓      | ✓      | ✓      | ✓      | ✓      | ✓      | ✓      | ✓       |
| 3. Performance-Related Activity (EWL)  | 98.4       | ✓                                                          | ✓      | ✓      | ✓      | ✓      | ✓      | ✓      | ✓      | ✓      | ✓       |
| 4. Hallucinogen-naïve                  | 97.9       | ✓                                                          | ✓      | ✓      | ✓      | ✓      | ✓      | ✓      | ✓      | ✓      | ✓       |
| 5. General Inactivation (EWL)          | 97.6       | ✓                                                          | ✓      | ✓      | ✓      | ✓      | ✓      | ✓      | ✓      | ✓      | ✓       |
| 6. Emotional Excitability (EWL)        | 96.6       | ✓                                                          | ✓      | ✓      | ✓      | ✓      | ✓      | ✓      | ✓      | ✓      | ✓       |
| 7. Extroversion-Introversion (EWL)     | 93.6       | ✓                                                          | ✓      | ✓      | ✓      | ✓      | ✓      | ✓      | ✓      | ✓      | ✓       |
| 8. Sociability (ZKPQ)                  | 91.7       | ✓                                                          | ✓      | ✓      | ✓      | ✓      | ✓      | ✓      | ✓      | ✓      | ✓       |
| 9. Positron emission tomography        | 90.5       | ✓                                                          | ✓      | ✓      | ✓      | ✓      | ✓      | ✓      | ✓      | ✓      | ✓       |
| 10. General Well-Being (EWL)           | 90.5       | ✓                                                          | ✓      | ✓      | ✓      | ✓      | ✓      | ✓      | ✓      | ✓      | ✓       |
| 11. Activity (ZKPQ)                    | 89.8       | ✓                                                          | ✓      | ✓      | ✓      | ✓      | ✓      | ✓      | ✓      | ✓      | ✓       |
| 12. Time of measuring                  | 89.6       | ✓                                                          | ✓      | ✓      | ✓      | ✓      | ✓      | ✓      | ✓      | ✓      | ✓       |
| 13. Anxiety-Depressiveness (EWL)       | 89.3       | ✓                                                          | ✓      | ✓      | ✓      | ✓      | ✓      | ✓      | ✓      | ✓      | ✓       |
| 14. Global Severity Index (SCL-90-R)   | 85.1       | ✓                                                          | ✓      | ✓      | ✓      | ✓      | ✓      | ✓      | ✓      | ✓      | ✓       |
| 15. Aggression-Hostility (ZKPQ)        | 78.8       | ✓                                                          | ✓      | ✓      | ✓      | ✓      | ✓      | ✓      | ✓      | ✓      | ✓       |
| 16. Impulsive Sensation Seeking (ZKPQ) | 77.5       | ✓                                                          | ✓      | ✓      | ✓      | ✓      | ✓      | ✓      | ✓      | -      | ✓       |
| 17. Alcohol frequency                  | 71.0       | -                                                          | ✓      | -      | ✓      | ✓      | -      | ✓      | -      | -      | -       |
| 18. Neuroticism-Anxiety (ZKPQ)         | 70.6       | ✓                                                          | -      | -      | -      | ✓      | -      | -      | ✓      | ✓      | -       |
| 19. THC frequency                      | 69.1       | -                                                          | -      | -      | -      | -      | ✓      | ✓      | ✓      | -      | -       |
| 20. Daily smoker                       | 65.5       | -                                                          | -      | -      | ✓      | -      | ✓      | ✓      | -      | -      | ✓       |
| 21. Female                             | 58.4       | -                                                          | -      | -      | -      | -      | -      | -      | -      | -      | -       |
| 22. Years of education                 | 54.0       | -                                                          | -      | -      | -      | -      | -      | -      | -      | -      | -       |
| 23. Age                                | 53.3       | -                                                          | -      | -      | -      | -      | -      | -      | -      | -      | -       |
| 24. Body mass index                    | 48.6       | -                                                          | -      | -      | -      | -      | -      | -      | -      | -      | -       |
| Model selection frequency (%)          |            | 1.1                                                        | 0.8    | 0.6    | 0.6    | 0.6    | 0.5    | 0.5    | 0.5    | 0.4    | 0.4     |

✓, variables included in the model; -, variables not selected.

\* The number of variables in the model is given within parentheses.

Pooled parameter estimates of the best model for the dependent variable  $\sqrt{\text{Elementary Imagery}}$

| Predictors                         | Coefficient | Standard error | P-value  | HPD CI low | HPD CI high | n missings | FMI  | RIV  |
|------------------------------------|-------------|----------------|----------|------------|-------------|------------|------|------|
| Drug dose                          | 0.56        | 0.11           | 0.00 *** | 0.34       | 0.77        | 0          | 0.15 | 0.17 |
| Absorption (TAS)                   | 0.36        | 0.14           | 0.01 **  | 0.09       | 0.64        | 312        | 0.40 | 0.63 |
| Performance-Related Activity (EWL) | 0.45        | 0.14           | 0.00 *** | 0.18       | 0.73        | 224        | 0.29 | 0.39 |
| Hallucinogen-naïve                 | 0.13        | 0.12           | 0.24     | -0.09      | 0.36        | 40         | 0.23 | 0.29 |
| General Inactivation (EWL)         | 0.05        | 0.13           | 0.74     | -0.20      | 0.31        | 224        | 0.30 | 0.42 |
| Emotional Excitability (EWL)       | 0.18        | 0.14           | 0.23     | -0.12      | 0.45        | 224        | 0.45 | 0.78 |
| Extroversion-Introversion (EWL)    | -0.15       | 0.19           | 0.44     | -0.54      | 0.21        | 224        | 0.46 | 0.81 |
| Sociability (ZKPQ)                 | 0.21        | 0.13           | 0.11     | -0.05      | 0.46        | 182        | 0.36 | 0.54 |
| Positron emission tomography       | -0.15       | 0.21           | 0.50     | -0.58      | 0.26        | 0          | 0.46 | 0.81 |
| General Well-Being (EWL)           | -0.04       | 0.21           | 0.84     | -0.44      | 0.35        | 224        | 0.46 | 0.81 |
| Activity (ZKPQ)                    | -0.14       | 0.12           | 0.26     | -0.38      | 0.10        | 182        | 0.29 | 0.39 |
| Time of measuring                  | 0.22        | 0.10           | 0.03 *   | 0.02       | 0.42        | 0          | 0.06 | 0.07 |
| Anxiety-Depressiveness (EWL)       | 0.02        | 0.14           | 0.89     | -0.27      | 0.29        | 224        | 0.28 | 0.38 |
| Global Severity Index (SCL-90-R)   | -0.09       | 0.13           | 0.49     | -0.35      | 0.17        | 111        | 0.28 | 0.37 |
| Aggression-Hostility (ZKPQ)        | -0.10       | 0.12           | 0.42     | -0.33      | 0.14        | 182        | 0.21 | 0.26 |
| Impulsive Sensation Seeking (ZKPQ) | -0.09       | 0.17           | 0.62     | -0.42      | 0.24        | 182        | 0.44 | 0.74 |
| Neuroticism-Anxiety (ZKPQ)         | -0.15       | 0.14           | 0.30     | -0.43      | 0.13        | 182        | 0.32 | 0.45 |

Note. HPD = Highest Posterior Density. CI = Confidence Interval. FMI = Fraction of missing information. RIV = Relative increase in variance due to missingness.

Model selection for the dependent variable  $\log(\text{Audio-Visual Synesthesiae})$

| Predictors                             | Step 1 (%) | Models selected in step 2 (the first 10 models are shown)* |        |        |        |        |        |        |        |        |         |
|----------------------------------------|------------|------------------------------------------------------------|--------|--------|--------|--------|--------|--------|--------|--------|---------|
|                                        |            | 1 (20)                                                     | 2 (19) | 3 (21) | 4 (19) | 5 (19) | 6 (19) | 7 (18) | 8 (19) | 9 (23) | 10 (18) |
| 1. Drug dose                           | 100.0      | ✓                                                          | ✓      | ✓      | ✓      | ✓      | ✓      | ✓      | ✓      | ✓      | ✓       |
| 2. Positron emission tomography        | 99.9       | ✓                                                          | ✓      | ✓      | ✓      | ✓      | ✓      | ✓      | ✓      | ✓      | ✓       |
| 3. Emotional Excitability (EWL)        | 99.6       | ✓                                                          | ✓      | ✓      | ✓      | ✓      | ✓      | ✓      | ✓      | ✓      | ✓       |
| 4. Absorption (TAS)                    | 99.2       | ✓                                                          | ✓      | ✓      | ✓      | ✓      | ✓      | ✓      | ✓      | ✓      | ✓       |
| 5. Performance-Related Activity (EWL)  | 97.7       | ✓                                                          | ✓      | ✓      | ✓      | ✓      | ✓      | ✓      | ✓      | ✓      | ✓       |
| 6. Hallucinogen-naïve                  | 96.6       | ✓                                                          | ✓      | ✓      | ✓      | ✓      | ✓      | ✓      | ✓      | ✓      | ✓       |
| 7. General Inactivation (EWL)          | 96.0       | ✓                                                          | ✓      | ✓      | ✓      | ✓      | ✓      | ✓      | ✓      | ✓      | ✓       |
| 8. Alcohol frequency                   | 91.4       | ✓                                                          | ✓      | ✓      | ✓      | ✓      | ✓      | ✓      | ✓      | ✓      | ✓       |
| 9. General Well-Being (EWL)            | 91.2       | ✓                                                          | ✓      | ✓      | ✓      | ✓      | ✓      | ✓      | ✓      | ✓      | ✓       |
| 10. Extroversion-Introversion (EWL)    | 88.8       | ✓                                                          | ✓      | ✓      | ✓      | ✓      | ✓      | ✓      | ✓      | ✓      | ✓       |
| 11. Activity (ZKPQ)                    | 88.0       | ✓                                                          | ✓      | ✓      | ✓      | ✓      | ✓      | ✓      | ✓      | ✓      | ✓       |
| 12. Neuroticism-Anxiety (ZKPQ)         | 87.1       | ✓                                                          | ✓      | ✓      | ✓      | ✓      | ✓      | ✓      | ✓      | ✓      | ✓       |
| 13. Anxiety-Depressiveness (EWL)       | 87.1       | ✓                                                          | ✓      | ✓      | ✓      | ✓      | ✓      | ✓      | –      | ✓      | ✓       |
| 14. Impulsive Sensation Seeking (ZKPQ) | 84.8       | ✓                                                          | ✓      | ✓      | ✓      | ✓      | ✓      | ✓      | ✓      | ✓      | ✓       |
| 15. THC frequency                      | 84.5       | ✓                                                          | ✓      | ✓      | ✓      | ✓      | ✓      | –      | ✓      | ✓      | ✓       |
| 16. Sociability (ZKPQ)                 | 83.4       | ✓                                                          | ✓      | ✓      | ✓      | ✓      | ✓      | ✓      | ✓      | ✓      | ✓       |
| 17. Aggression-Hostility (ZKPQ)        | 81.3       | ✓                                                          | ✓      | ✓      | ✓      | ✓      | –      | ✓      | ✓      | ✓      | ✓       |
| 18. Time of measuring                  | 79.3       | ✓                                                          | ✓      | ✓      | –      | ✓      | ✓      | ✓      | ✓      | ✓      | –       |
| 19. Global Severity Index (SCL-90-R)   | 77.8       | ✓                                                          | –      | ✓      | ✓      | ✓      | ✓      | ✓      | ✓      | ✓      | –       |
| 20. Years of education                 | 68.8       | –                                                          | –      | ✓      | –      | –      | –      | –      | –      | ✓      | –       |
| 21. Age                                | 65.0       | –                                                          | –      | –      | –      | –      | –      | –      | –      | ✓      | –       |
| 22. Daily smoker                       | 62.6       | –                                                          | –      | –      | –      | –      | –      | –      | –      | ✓      | –       |
| 23. Female                             | 61.2       | ✓                                                          | ✓      | ✓      | ✓      | –      | ✓      | –      | ✓      | ✓      | ✓       |
| 24. Body mass index                    | 51.6       | –                                                          | –      | –      | –      | –      | –      | –      | –      | –      | –       |
| Model selection frequency (%)          |            | 0.7                                                        | 0.6    | 0.4    | 0.4    | 0.4    | 0.4    | 0.3    | 0.3    | 0.3    | 0.2     |

✓, variables included in the model; –, variables not selected.

\* The number of variables in the model is given within parentheses.

Pooled parameter estimates of the best model for the dependent variable  $\log(\text{Audio-Visual Synesthesiae})$

| Predictors                         | Coefficient | Standard error | P-value |     | HPD CI low | HPD CI high | n missings | FMI  | RIV  |
|------------------------------------|-------------|----------------|---------|-----|------------|-------------|------------|------|------|
| Drug dose                          | 0.43        | 0.11           | 0.00    | *** | 0.22       | 0.65        | 0          | 0.19 | 0.23 |
| Positron emission tomography       | -0.42       | 0.23           | 0.05    |     | -0.88      | 0.01        | 0          | 0.53 | 1.07 |
| Emotional Excitability (EWL)       | 0.27        | 0.14           | 0.04    | *   | 0.01       | 0.54        | 224        | 0.39 | 0.62 |
| Absorption (TAS)                   | 0.51        | 0.15           | 0.00    | *** | 0.22       | 0.81        | 312        | 0.52 | 1.02 |
| Performance-Related Activity (EWL) | 0.31        | 0.15           | 0.04    | *   | 0.02       | 0.59        | 224        | 0.36 | 0.55 |
| Hallucinogen-naïve                 | 0.06        | 0.11           | 0.56    |     | -0.15      | 0.28        | 40         | 0.15 | 0.18 |
| General Inactivation (EWL)         | -0.05       | 0.14           | 0.70    |     | -0.32      | 0.21        | 224        | 0.39 | 0.61 |
| Alcohol frequency                  | 0.30        | 0.11           | 0.01    | **  | 0.08       | 0.52        | 83         | 0.26 | 0.33 |
| General Well-Being (EWL)           | 0.11        | 0.21           | 0.61    |     | -0.30      | 0.52        | 224        | 0.49 | 0.90 |
| Extroversion-Introversion (EWL)    | -0.23       | 0.19           | 0.22    |     | -0.62      | 0.14        | 224        | 0.45 | 0.78 |
| Activity (ZKPQ)                    | 0.05        | 0.12           | 0.66    |     | -0.19      | 0.29        | 182        | 0.30 | 0.42 |
| Neuroticism-Anxiety (ZKPQ)         | -0.09       | 0.15           | 0.56    |     | -0.38      | 0.20        | 182        | 0.41 | 0.66 |
| Anxiety-Depressiveness (EWL)       | 0.10        | 0.14           | 0.50    |     | -0.19      | 0.38        | 224        | 0.33 | 0.48 |
| Impulsive Sensation Seeking (ZKPQ) | -0.12       | 0.16           | 0.49    |     | -0.43      | 0.20        | 182        | 0.40 | 0.63 |
| THC sometimes vs rarely            | -0.13       | 0.12           | 0.25    |     | -0.36      | 0.10        | 47         | 0.20 | 0.25 |
| THC rarely vs never                | -0.03       | 0.15           | 0.85    |     | -0.31      | 0.26        | 47         | 0.14 | 0.17 |
| Sociability (ZKPQ)                 | 0.28        | 0.12           | 0.03    | *   | 0.03       | 0.52        | 182        | 0.29 | 0.39 |
| Aggression-Hostility (ZKPQ)        | 0.03        | 0.13           | 0.81    |     | -0.23      | 0.28        | 182        | 0.35 | 0.51 |
| Time of measuring                  | 0.18        | 0.10           | 0.08    |     | -0.02      | 0.38        | 0          | 0.08 | 0.09 |
| Global Severity Index (SCL-90-R)   | -0.16       | 0.13           | 0.25    |     | -0.42      | 0.11        | 111        | 0.35 | 0.52 |
| Female                             | -0.07       | 0.11           | 0.53    |     | -0.28      | 0.15        | 0          | 0.20 | 0.24 |

Note. HPD = Highest Posterior Density. CI = Confidence Interval. FMI = Fraction of missing information. RIV = Relative increase in variance due to missingness.

*Model selection for the dependent variable  $\sqrt{\text{Changed Meaning of Percepts}}$*

| Predictors                             | Step 1 (%) | Models selected in step 2 (the first 10 models are shown)* |        |        |        |        |        |        |        |        |         |
|----------------------------------------|------------|------------------------------------------------------------|--------|--------|--------|--------|--------|--------|--------|--------|---------|
|                                        |            | 1 (18)                                                     | 2 (20) | 3 (19) | 4 (17) | 5 (18) | 6 (17) | 7 (18) | 8 (18) | 9 (17) | 10 (19) |
| 1. Drug dose                           | 100.0      | ✓                                                          | ✓      | ✓      | ✓      | ✓      | ✓      | ✓      | ✓      | ✓      | ✓       |
| 2. Absorption (TAS)                    | 99.8       | ✓                                                          | ✓      | ✓      | ✓      | ✓      | ✓      | ✓      | ✓      | ✓      | ✓       |
| 3. Performance-Related Activity (EWL)  | 99.8       | ✓                                                          | ✓      | ✓      | ✓      | ✓      | ✓      | ✓      | ✓      | ✓      | ✓       |
| 4. Hallucinogen-naïve                  | 99.3       | ✓                                                          | ✓      | ✓      | ✓      | ✓      | ✓      | ✓      | ✓      | ✓      | ✓       |
| 5. Positron emission tomography        | 97.8       | ✓                                                          | ✓      | ✓      | ✓      | ✓      | ✓      | ✓      | ✓      | ✓      | ✓       |
| 6. General Inactivation (EWL)          | 94.5       | ✓                                                          | ✓      | ✓      | ✓      | ✓      | ✓      | ✓      | ✓      | ✓      | ✓       |
| 7. Emotional Excitability (EWL)        | 94.3       | ✓                                                          | ✓      | ✓      | ✓      | ✓      | ✓      | ✓      | ✓      | ✓      | ✓       |
| 8. Global Severity Index (SCL-90-R)    | 93.4       | ✓                                                          | ✓      | ✓      | ✓      | ✓      | ✓      | ✓      | ✓      | ✓      | ✓       |
| 9. General Well-Being (EWL)            | 92.7       | ✓                                                          | ✓      | ✓      | ✓      | ✓      | ✓      | ✓      | ✓      | ✓      | ✓       |
| 10. Extroversion-Introversion (EWL)    | 92.2       | ✓                                                          | ✓      | ✓      | ✓      | ✓      | ✓      | ✓      | ✓      | ✓      | ✓       |
| 11. Time of measuring                  | 87.4       | ✓                                                          | ✓      | ✓      | ✓      | ✓      | ✓      | ✓      | ✓      | ✓      | ✓       |
| 12. Activity (ZKPQ)                    | 85.8       | ✓                                                          | ✓      | ✓      | ✓      | ✓      | ✓      | ✓      | -      | ✓      | ✓       |
| 13. Anxiety-Depressiveness (EWL)       | 85.8       | ✓                                                          | ✓      | ✓      | ✓      | ✓      | ✓      | ✓      | ✓      | ✓      | ✓       |
| 14. Sociability (ZKPQ)                 | 84.3       | ✓                                                          | ✓      | ✓      | ✓      | ✓      | ✓      | ✓      | ✓      | -      | ✓       |
| 15. Impulsive Sensation Seeking (ZKPQ) | 83.8       | ✓                                                          | ✓      | ✓      | ✓      | ✓      | ✓      | ✓      | ✓      | ✓      | ✓       |
| 16. Alcohol frequency                  | 82.0       | ✓                                                          | ✓      | ✓      | ✓      | -      | ✓      | ✓      | ✓      | ✓      | ✓       |
| 17. Age                                | 77.9       | -                                                          | ✓      | ✓      | -      | ✓      | -      | ✓      | ✓      | -      | -       |
| 18. Aggression-Hostility (ZKPQ)        | 77.9       | ✓                                                          | ✓      | ✓      | ✓      | ✓      | -      | ✓      | ✓      | ✓      | ✓       |
| 19. Neuroticism-Anxiety (ZKPQ)         | 74.5       | ✓                                                          | ✓      | ✓      | -      | ✓      | ✓      | -      | ✓      | ✓      | ✓       |
| 20. Years of education                 | 64.5       | -                                                          | ✓      | -      | -      | -      | -      | -      | -      | -      | ✓       |
| 21. Female                             | 63.2       | -                                                          | -      | -      | -      | -      | -      | -      | -      | -      | -       |
| 22. Daily smoker                       | 59.2       | -                                                          | -      | -      | -      | -      | -      | -      | -      | -      | -       |
| 23. THC frequency                      | 50.9       | -                                                          | -      | -      | -      | -      | -      | -      | -      | -      | -       |
| 24. Body mass index                    | 49.5       | -                                                          | -      | -      | -      | -      | -      | -      | -      | -      | -       |
| Model selection frequency (%)          |            | 1.3                                                        | 1.0    | 1.0    | 0.6    | 0.5    | 0.5    | 0.5    | 0.4    | 0.4    | 0.4     |

✓, variables included in the model; -, variables not selected.

\* The number of variables in the model is given within parentheses.

*Pooled parameter estimates of the best model for the dependent variable  $\sqrt{\text{Changed Meaning of Percepts}}$*

| Predictors                         | Coefficient | Standard error | P-value |     | HPD CI low | HPD CI high | n missings | FMI  | RIV  |
|------------------------------------|-------------|----------------|---------|-----|------------|-------------|------------|------|------|
| Drug dose                          | 0.47        | 0.10           | 0.00    | *** | 0.27       | 0.68        | 0          | 0.13 | 0.15 |
| Absorption (TAS)                   | 0.33        | 0.16           | 0.05    | *   | 0.02       | 0.63        | 312        | 0.55 | 1.14 |
| Performance-Related Activity (EWL) | 0.56        | 0.16           | 0.00    | *** | 0.26       | 0.87        | 224        | 0.47 | 0.85 |
| Hallucinogen-naïve                 | 0.24        | 0.11           | 0.02    | *   | 0.03       | 0.46        | 40         | 0.15 | 0.18 |
| Positron emission tomography       | 0.05        | 0.19           | 0.77    |     | -0.32      | 0.42        | 0          | 0.32 | 0.45 |
| General Inactivation (EWL)         | 0.19        | 0.14           | 0.17    |     | -0.07      | 0.47        | 224        | 0.43 | 0.71 |
| Emotional Excitability (EWL)       | 0.11        | 0.14           | 0.45    |     | -0.16      | 0.38        | 224        | 0.45 | 0.80 |
| Global Severity Index (SCL-90-R)   | -0.03       | 0.13           | 0.81    |     | -0.28      | 0.22        | 111        | 0.31 | 0.44 |
| General Well-Being (EWL)           | -0.13       | 0.22           | 0.58    |     | -0.55      | 0.31        | 224        | 0.57 | 1.24 |
| Extroversion-Introversion (EWL)    | -0.09       | 0.17           | 0.63    |     | -0.44      | 0.25        | 224        | 0.33 | 0.48 |
| Time of measuring                  | -0.12       | 0.10           | 0.24    |     | -0.31      | 0.08        | 0          | 0.10 | 0.11 |
| Activity (ZKPQ)                    | -0.18       | 0.12           | 0.14    |     | -0.42      | 0.06        | 182        | 0.35 | 0.52 |
| Anxiety-Depressiveness (EWL)       | 0.07        | 0.14           | 0.63    |     | -0.21      | 0.34        | 224        | 0.32 | 0.47 |
| Sociability (ZKPQ)                 | 0.03        | 0.13           | 0.81    |     | -0.24      | 0.29        | 182        | 0.43 | 0.74 |
| Impulsive Sensation Seeking (ZKPQ) | 0.09        | 0.18           | 0.62    |     | -0.27      | 0.42        | 182        | 0.52 | 1.03 |
| Alcohol frequency                  | 0.05        | 0.11           | 0.68    |     | -0.16      | 0.26        | 83         | 0.22 | 0.28 |
| Aggression-Hostility (ZKPQ)        | 0.09        | 0.12           | 0.50    |     | -0.15      | 0.33        | 182        | 0.32 | 0.45 |
| Neuroticism-Anxiety (ZKPQ)         | -0.10       | 0.14           | 0.47    |     | -0.38      | 0.17        | 182        | 0.35 | 0.52 |

Note. HPD = Highest Posterior Density. CI = Confidence Interval. FMI = Fraction of missing information. RIV = Relative increase in variance due to missingness.
